# Supplementary material for: Aberrant Scinderin Expression Correlates With Liver Metastasis and Poor Prognosis in Colorectal Cancer
Source: PubMed Central journal article supplement (PMC6836707; doi:10.3389/fphar.2019.01183), 2019-10-31
Supplement: DataSheet_1.pdf [file DataSheet_1.pdf]

## *Supplementary Material*

### Supplemental Tables

**Supplementary Table 1: the baseline data of the gene chip patients**

| number | gender | age | primary tumor site | tumor size (cm) | Pathological type | differentiation | TNM stage |
|--------|--------|-----|--------------------|-----------------|-------------------|-----------------|-----------|
| A      | male   | 63  | rectum             | 8               | Ulcerative type   | moderate        | T3N1M1    |
| C      | male   | 52  | descending colon   | 4               | Ulcerative type   | moderate        | T3N1M1    |
| D      | male   | 67  | rectum             | 3               | Ulcerative type   | moderate        | T3N2M1    |
| F      | female | 42  | rectum             | 5               | Ulcerative type   | moderate        | T4N1M1    |
| E      | male   | 40  | Sigmoid colon      | 4               | Ulcerative type   | poorly          | T4N2M1    |
| B      | male   | 54  | Sigmoid colon      | 4               | Ulcerative type   | moderate        | T4N0M0    |
| H      | male   | 37  | ascending colon    | 5               | Ulcerative type   | moderate        | T3N0M0    |
| I      | male   | 55  | rectum             | 3               | Ulcerative type   | moderate        | T3N0M0    |
| L      | male   | 64  | rectum             | 5               | Ulcerative type   | moderate        | T4N0M0    |
| K      | female | 68  | ascending colon    | 6               | Ulcerative type   | moderate        | T3N0M0    |
| J      | male   | 29  | ascending colon    | 12              | Ulcerative type   | poorly          | T4N0M0    |

**Supplementary Table 2: the differentially 110 genes by SAM method**

| ProbeSet    | Score | FC       | Entrez     | Symbol | Gene Title                                         |
|-------------|-------|----------|------------|--------|----------------------------------------------------|
| 219312_s_at | 4.72  | 2.3<br>2 | 65986      | ZBTB10 | zinc finger and BTB domain containing 10           |
| 228562_at   | 4.61  | 2.2<br>7 | 65986      | ZBTB10 | Zinc finger and BTB domain containing 10           |
| 230573_at   | 4.54  | 2.4<br>2 | 10110      | SGK2   | serum/glucocorticoid regulated kinase 2            |
| 208886_at   | 4.49  | 2.4<br>5 | 3005       | H1F0   | H1 histone family, member 0                        |
| 236557_at   | 4.33  | 3.1<br>9 | 25346<br>1 | ZBTB38 | zinc finger and BTB domain containing 38           |
| 226064_s_at | 4.25  | 3.1<br>5 | 84649      | DGAT2  | diacylglycerol O-acyltransferase homolog 2 (mouse) |
| 209691_s_at | 4.24  | 2.7<br>6 | 55715      | DOK4   | docking protein 4                                  |
| 200632_s_at | 4.20  | 2.0      | 10397      | NDRG1  | N-myc downstream regulated gene 1                  |

| ProbeSet     | Score | FC       | Entrez     | Symbol        | Gene Title                                                                               |
|--------------|-------|----------|------------|---------------|------------------------------------------------------------------------------------------|
|              |       | 8        |            |               |                                                                                          |
| 220349_s_at  | 4.14  | 2.0<br>7 | 64772      | FLJ21865      | endo-beta-N-acetylglucosaminidase                                                        |
| 211354_s_at  | 4.13  | 3.0<br>7 | 3953       | LEPR          | leptin receptor                                                                          |
| 226961_at    | 4.10  | 2.8<br>0 | 22217<br>1 | LOC22217<br>1 | hypothetical protein LOC222171                                                           |
| 1555467_a_at | 4.00  | 2.7<br>2 | 10658      | CUGBP1        | CUG triplet repeat, RNA binding protein 1                                                |
| 244261_at    | 4.00  | 2.2<br>0 | 16370<br>2 | IL28RA        | interleukin 28 receptor, alpha (interferon, lambda receptor)                             |
| 233899_x_at  | 3.97  | 2.4<br>5 | 65986      | ZBTB10        | Zinc finger and BTB domain containing 10                                                 |
| 230784_at    | 3.88  | 5.3<br>9 | 84366      | PRAC          | small nuclear protein PRAC                                                               |
| 220161_s_at  | 3.83  | 2.2<br>1 | 54566      | EPB41L4B      | erythrocyte membrane protein band 4.1 like 4B                                            |
| 206286_s_at  | 3.80  | 2.8<br>7 | 6997       | TDGF1         | teratocarcinoma-derived growth factor 1                                                  |
| 236518_at    | 3.78  | 2.6<br>9 | 84960      | KIAA1984      | KIAA1984                                                                                 |
| 219215_s_at  | 3.70  | 2.9<br>7 | 55630      | SLC39A4       | solute carrier family 39 (zinc transporter), member 4                                    |
| 229986_at    | 3.68  | 2.1<br>7 | 37706<br>4 | LOC37706<br>4 | kruppel-like zinc finger factor X17                                                      |
| 225177_at    | 3.56  | 2.0<br>2 | 80223      | RAB11FIP<br>1 | RAB11 family interacting protein 1 (class I)                                             |
| 218345_at    | 3.48  | 2.2<br>9 | 55365      | HCA112        | hepatocellular carcinoma-associated antigen 112                                          |
| 208510_s_at  | 3.48  | 2.5<br>4 | 5468       | PPARG         | peroxisome proliferative activated receptor, gamma                                       |
| 1552334_at   | 3.38  | 2.6<br>3 | 11078      | TRIOBP        | TRIO and F-actin binding protein                                                         |
| 228876_at    | 3.38  | 2.1<br>3 | 80115      | BAIAP2L2      | BAI1-associated protein 2-like 2                                                         |
| 1555829_at   | 3.33  | 2.4<br>8 | 57488      | FAM62B        | family with sequence similarity 62 (C2 domain containing) member B                       |
| 214848_at    | 3.28  | 2.0<br>2 | 7534       | YWHAZ         | Tyrosine 3-monooxygenase/tryptophan 5-monooxygenase activation protein, zeta polypeptide |
| 229377_at    | 3.18  | 2.0<br>0 | 79774      | G RTP1        | Growth hormone regulated TBC protein 1                                                   |
| 202314_at    | 3.16  | 2.1<br>8 | 1595       | CYP51A1       | cytochrome P450, family 51, subfamily A, polypeptide 1                                   |
| 1552365_at   | 3.15  | 2.5<br>5 | 85477      | SCIN          | scinderin                                                                                |

| ProbeSet     | Score | FC       | Entrez     | Symbol   | Gene Title                                                                   |
|--------------|-------|----------|------------|----------|------------------------------------------------------------------------------|
| 205593_s_at  | 3.15  | 6.6<br>7 | 5152       | PDE9A    | phosphodiesterase 9A                                                         |
| 203953_s_at  | 3.14  | 3.2<br>5 | 1365       | CLDN3    | claudin 3                                                                    |
| 241547_at    | 3.13  | 2.2<br>7 | ---        | ---      | MRNA; cDNA DKFZp779G2222 (from clone DKFZp779G2222)                          |
| 220951_s_at  | 3.13  | 2.2<br>5 | 29974      | ACF      | apobec-1 complementation factor                                              |
| 203954_x_at  | 3.10  | 2.5<br>9 | 1365       | CLDN3    | claudin 3                                                                    |
| 44790_s_at   | 3.07  | 2.5<br>3 | 80183      | C13orf18 | chromosome 13 open reading frame 18                                          |
| 213435_at    | 3.06  | 2.2<br>9 | 23314      | SATB2    | SATB family member 2                                                         |
| 213324_at    | 3.01  | 2.3<br>5 | 6714       | SRC      | v-src sarcoma (Schmidt-Ruppin A-2) viral oncogene homolog (avian)            |
| 239859_x_at  | 2.97  | 2.9<br>0 | 8814       | CDKL1    | Cyclin-dependent kinase-like 1 (CDC2-related kinase)                         |
| 1555788_a_at | 2.97  | 2.4<br>1 | 57761      | TRIB3    | tribbles homolog 3 (Drosophila)                                              |
| 218510_x_at  | 2.96  | 2.0<br>0 | 54463      | FLJ20152 | hypothetical protein FLJ20152                                                |
| 229358_at    | 2.96  | 2.1<br>8 | 3549       | IHH      | Indian hedgehog homolog (Drosophila)                                         |
| 219471_at    | 2.94  | 2.1<br>9 | 80183      | C13orf18 | chromosome 13 open reading frame 18                                          |
| 227371_at    | 2.93  | 2.0<br>5 | 55971      | BAIAP2L1 | BAI1-associated protein 2-like 1                                             |
| 242604_at    | 2.85  | 2.4<br>8 | 28267<br>9 | AQP11    | Aquaporin 11                                                                 |
| 223423_at    | 2.82  | 2.5<br>2 | 26996      | GPR160   | G protein-coupled receptor 160                                               |
| 221020_s_at  | 2.79  | 2.0<br>2 | 81034      | SLC25A32 | solute carrier family 25, member 32 /// solute carrier family 25, member 32  |
| 228302_x_at  | 2.76  | 2.3<br>2 | 55450      | CAMK2N1  | calcium/calmodulin-dependent protein kinase II inhibitor 1                   |
| 203628_at    | 2.75  | 2.1<br>4 | 3480       | IGF1R    | insulin-like growth factor 1 receptor                                        |
| 213308_at    | 2.75  | 2.3<br>0 | 22941      | SHANK2   | SH3 and multiple ankyrin repeat domains 2                                    |
| 227845_s_at  | 2.74  | 2.4<br>2 | 56961      | SHD      | Src homology 2 domain containing transforming protein D                      |
| 209051_s_at  | 2.74  | 2.3<br>1 | 5900       | RALGDS   | ral guanine nucleotide dissociation stimulator                               |
| 225727_at    | 2.73  | 2.6<br>3 | 57475      | PLEKHH1  | pleckstrin homology domain containing, family H (with MyTH4 domain) member 1 |

| ProbeSet     | Score | FC   | Entrez | Symbol    | Gene Title                                                                                |
|--------------|-------|------|--------|-----------|-------------------------------------------------------------------------------------------|
| 209309_at    | 2.71  | 2.68 | 563    | AZGP1     | alpha-2-glycoprotein 1, zinc                                                              |
| 205081_at    | 2.71  | 2.44 | 1396   | CRIP1     | cysteine-rich protein 1 (intestinal)                                                      |
| 242871_at    | 2.70  | 2.65 | 54852  | PAQR5     | progesterin and adipoQ receptor family member V                                           |
| 206268_at    | 2.70  | 2.90 | 10637  | LEFTY1    | left-right determination factor 1                                                         |
| 218814_s_at  | 2.70  | 2.05 | 55248  | C1orf75   | chromosome 1 open reading frame 75                                                        |
| 210808_s_at  | 2.70  | 2.92 | 27035  | NOX1      | NADPH oxidase 1                                                                           |
| 206992_s_at  | 2.70  | 2.03 | 27109  | ATP5S     | ATP synthase, H <sup>+</sup> transporting, mitochondrial F0 complex, subunit s (factor B) |
| 215986_at    | -4.34 | 0.40 | ---    | ---       | CDNA FLJ12058 fis, clone HEMBB1002092                                                     |
| 1559618_at   | -4.33 | 0.43 | 1840   | DTX1      | Deltex homolog 1 (Drosophila)                                                             |
| 1555153_s_at | -4.03 | 0.49 | 115548 | FCHO2     | FCH domain only 2                                                                         |
| 218935_at    | -3.94 | 0.43 | 30845  | EHD3      | EH-domain containing 3                                                                    |
| 227474_at    | -3.77 | 0.42 | 7849   | PAX8      | Paired box gene 8                                                                         |
| 239596_at    | -3.74 | 0.49 | 148867 | SLC30A7   | solute carrier family 30 (zinc transporter), member 7                                     |
| 207375_s_at  | -3.72 | 0.42 | 3601   | IL15RA    | interleukin 15 receptor, alpha                                                            |
| 1555421_at   | -3.66 | 0.30 | 130340 | AP1S3     | adaptor-related protein complex 1, sigma 3 subunit                                        |
| 206340_at    | -3.59 | 0.47 | 9971   | NR1H4     | nuclear receptor subfamily 1, group H, member 4                                           |
| 212624_s_at  | -3.57 | 0.40 | 1123   | CHN1      | chimerin (chimaerin) 1                                                                    |
| 238050_at    | -3.55 | 0.28 | ---    | ---       | Transcribed locus                                                                         |
| 239418_x_at  | -3.50 | 0.49 | 404033 | FLJ34077  | Weakly similar to zinc finger protein 195                                                 |
| 221261_x_at  | -3.46 | 0.46 | 81557  | MAGED4    | melanoma antigen family D, 4 /// melanoma antigen family D, 4                             |
| 210115_at    | -3.46 | 0.50 | 116832 | RPL39L    | ribosomal protein L39-like                                                                |
| 238790_at    | -3.43 | 0.25 | 374443 | LOC374443 | CLR pseudogene                                                                            |
| 1564670_at   | -3.41 | 0.45 | 10266  | RAMP2     | Receptor (calcitonin) activity modifying protein 2                                        |

| ProbeSet     | Score | FC       | Entrez     | Symbol  | Gene Title                                                                                       |
|--------------|-------|----------|------------|---------|--------------------------------------------------------------------------------------------------|
| 205667_at    | -3.31 | 0.4<br>9 | 7486       | WRN     | Werner syndrome                                                                                  |
| 229327_s_at  | -3.30 | 0.4<br>1 | 4094       | MAF     | V-maf musculoaponeurotic fibrosarcoma oncogene homolog (avian)                                   |
| 207709_at    | -3.24 | 0.4<br>1 | 5563       | PRKAA2  | protein kinase, AMP-activated, alpha 2 catalytic subunit                                         |
| 206455_s_at  | -3.16 | 0.2<br>7 | 6010       | RHO     | rhodopsin (opsin 2, rod pigment) (retinitis pigmentosa 4, autosomal dominant)                    |
| 238617_at    | -3.16 | 0.4<br>4 | ---        | ---     | CDNA FLJ38181 fis, clone FCBBF1000125                                                            |
| 241866_at    | -3.15 | 0.4<br>2 | 9194       | SLC16A7 | solute carrier family 16 (monocarboxylic acid transporters), member 7                            |
| 238584_at    | -3.12 | 0.2<br>6 | 79781      | IQCA    | IQ motif containing with AAA domain                                                              |
| 219983_at    | -3.11 | 0.3<br>7 | 57110      | HRASLS  | HRAS-like suppressor                                                                             |
| 211863_x_at  | -3.07 | 0.4<br>2 | 3077       | HFE     | hemochromatosis                                                                                  |
| 212921_at    | -3.07 | 0.4<br>8 | 56950      | SMYD2   | SET and MYND domain containing 2                                                                 |
| 237602_at    | -3.06 | 0.4<br>4 | 57554      | LRRC7   | Leucine rich repeat containing 7                                                                 |
| 244427_at    | -3.04 | 0.4<br>9 | 9493       | KIF23   | Kinesin family member 23                                                                         |
| 1560526_at   | -3.01 | 0.3<br>9 | 26667<br>1 | PR47    | platelet receptor for type III collagen, 47 kDa                                                  |
| 1555912_at   | -3.00 | 0.4<br>0 | 93653      | ST7OT1  | ST7 overlapping transcript 1 (antisense non-coding RNA)                                          |
| 232453_at    | -2.99 | 0.1<br>4 | 10082      | GPC6    | Glypican 6                                                                                       |
| 234472_at    | -2.92 | 0.4<br>6 | 11480<br>5 | GALNT13 | UDP-N-acetyl-alpha-D-galactosamine:polypeptide N-acetylgalactosaminyltransferase 13 (GalNAc-T13) |
| 206618_at    | -2.91 | 0.2<br>4 | 8809       | IL18R1  | interleukin 18 receptor 1                                                                        |
| 219454_at    | -2.89 | 0.3<br>9 | 25975      | EGFL6   | EGF-like-domain, multiple 6                                                                      |
| 237376_at    | -2.88 | 0.4<br>6 | 8452       | CUL3    | Cullin 3                                                                                         |
| 1554157_a_at | -2.86 | 0.4<br>6 | 90199      | WFDC8   | WAP four-disulfide core domain 8                                                                 |
| 225316_at    | -2.84 | 0.4<br>3 | 84879      | MFSD2   | major facilitator superfamily domain containing 2                                                |
| 205715_at    | -2.82 | 0.3<br>0 | 683        | BST1    | bone marrow stromal cell antigen 1                                                               |
| 243506_at    | -2.81 | 0.3      | ---        | ---     | Transcribed locus                                                                                |

| ProbeSet    | Score | FC   | Entrez | Symbol    | Gene Title                                            |
|-------------|-------|------|--------|-----------|-------------------------------------------------------|
|             |       | 4    |        |           |                                                       |
| 211866_x_at | -2.79 | 0.48 | 3077   | HFE       | hemochromatosis                                       |
| 204055_s_at | -2.78 | 0.35 | 4253   | CTAGE5    | CTAGE family, member 5                                |
| 206104_at   | -2.76 | 0.21 | 3670   | ISL1      | ISL1 transcription factor, LIM/homeodomain, (islet-1) |
| 202952_s_at | -2.75 | 0.35 | 8038   | ADAM12    | ADAM metallopeptidase domain 12 (meltrin alpha)       |
| 214341_at   | -2.74 | 0.49 | 8906   | APIG2     | adaptor-related protein complex 1, gamma 2 subunit    |
| 218484_at   | -2.74 | 0.46 | 56901  | LOC56901  | NADH:ubiquinone oxidoreductase MLRQ subunit homolog   |
| 1559631_at  | -2.73 | 0.44 | ---    | ---       | Homo sapiens, clone IMAGE:4045663, mRNA               |
| 1570021_at  | -2.73 | 0.41 | 360030 | LOC360030 | homeobox C14                                          |
| 230715_at   | -2.72 | 0.37 | 85460  | KIAA1729  | KIAA1729 protein                                      |
| 242171_at   | -2.72 | 0.42 | ---    | ---       | ---                                                   |
| 213309_at   | -2.70 | 0.50 | 23228  | PLCL2     | phospholipase C-like 2                                |

**Supplementary Table 3: the baseline data of the 60 patients examined by qRT-PCR**

|                    | CRC without LM | CRC with SLM | CRC with MLM |
|--------------------|----------------|--------------|--------------|
| Age                | 59.6±12.3      | 56.5±10.7    | 60.8±12.9    |
| Gender             |                |              |              |
| male               | 12             | 13           | 9            |
| female             | 8              | 7            | 11           |
| Primary tumor site |                |              |              |
| colon              | 10             | 13           | 13           |
| rectum             | 10             | 7            | 7            |
| Tumor diameter     | 5.05 ± 1.31    | 5.95 ± 1.50  | 6.10 ± 2.81  |
| T stage            |                |              |              |
| T 0-2              | 1              | 0            | 0            |
| T 3                | 3              | 0            | 5            |
| T4                 | 16             | 20           | 15           |
| N stage            |                |              |              |
| N0                 | 16             | 4            | 6            |
| N1                 | 3              | 9            | 6            |
| N2                 | 1              | 7            | 8            |

**Supplementary Table 4: The results of the Microarray analysis of DLD-1-shSCIN and shCon cells (257 genes upregulated, 695 genes downregulated)**

| Probe Set ID  | Gene Symbol | Entrez Gene | Alignments                                       | Regulation([KD] vs [NC]) |
|---------------|-------------|-------------|--------------------------------------------------|--------------------------|
| 11732684_a_at | ABCA12      | 26154       | chr2:215796266-216003151 (-) // 99.41 // q35     | up                       |
| 11730907_a_at | ABCB1       | 5243        | chr7:87132339-87342727 (-) // 96.55 // q21.12    | up                       |
| 11724538_a_at | ABCG2       | 9429        | chr4:89011416-89080214 (-) // 86.41 // q22.1     | up                       |
| 11746956_a_at | ABHD2       | 11057       | chr15:89631710-89745591 (+) // 91.33 // q26.1    | up                       |
| 11742135_at   | ACBD4       | 79777       | chr17:43213013-43216527 (+) // 74.87 // q21.31   | up                       |
| 11721065_at   | ADCY9       | 115         | chr16:4012649-4166186 (-) // 96.37 // p13.3      | up                       |
| 11729003_at   | ADRB1       | 153         | chr10:115803811-115806955 (+) // 92.4 // q25.3   | up                       |
| 11754888_a_at | ADSSL1      | 122622      | chr14:105210817-105213645 (+) // 84.06 // q32.33 | up                       |
| 11720421_at   | AFF4        | 27125       | chr5:132211075-132299354 (-) // 98.62 // q31.1   | up                       |
| 11717131_a_at | AHNAK2      | 113146      | chr14:105403589-105444694 (-) // 99.47 // q32.33 | up                       |
| 11715711_a_at | AKR1C3      | 8644        | chr10:5135984-5149878 (+) // 93.02 // p15.1      | up                       |
| 11757588_a_at | ALG5        | 29880       | chr13:37523980-37527163 (-) // 95.54 // q13.3    | up                       |
| 11744583_s_at | AMDHD2      | 51005       | chr16:2570365-2579732 (+) // 99.19 // p13.3      | up                       |
| 11757989_s_at | ANKRD46     | 157567      | chr8:101533001-101533436 (-) // 96.67 // q22.2   | up                       |
| 11740603_a_at | APH1B       | 83464       | chr15:63569748-63601324 (+) // 92.43 // q22.2    | up                       |
| 11715428_x_at | ARF4        | 378         | chr3:57557089-57583589 (-) // 80.35 // p14.3     | up                       |
| 11750222_a_at | ARID5B      | 84159       | chr10:63661446-63811107 (+) // 99.92 // q21.2    | up                       |
| 11716707_a_at | ARL2BP      | 23568       | chr16:57279009-57287547 (+) // 95.14 // q13      | up                       |
| 11746863_x_at | ARSJ        | 79642       | chr4:114821399-114900857 (-) // 93.05 // q26     | up                       |
| 11746932_a_at | ASPHD1      | 253982      | chr16:29912178-29931183 (+) // 78.21 // p11.2    | up                       |
| 11729305_a_at | ATAD1       | 84896       | chr10:89512874-89577950 (-) // 93.12 // q23.31   | up                       |
| 11719344_a_at | ATF3        | 467         | chr1:212781993-212794117 (+) // 99.08 // q32.3   | up                       |
| 11717801_a_at | ATF5        | 22809       | chr19:50431958-50437191 (+) // 88.96 // q13.33   | up                       |
| 11722183_s_at | ATP6V1C1    | 528         | chr8:104033244-104085912 (+) // 82.41 // q22.3   | up                       |

|               |                            |                        |                                                                                                                                                         |    |
|---------------|----------------------------|------------------------|---------------------------------------------------------------------------------------------------------------------------------------------------------|----|
| 11754004_a_at | ATP6V1G1                   | 9550                   | chr9:117349842-117360140 (+) // 90.78 // q32                                                                                                            | up |
| 11748950_a_at | BAZ2B                      | 29994                  | chr2:160255351-160472028 (-) // 94.96 // q24.2                                                                                                          | up |
| 11732337_x_at | BCAS1                      | 8537                   | chr20:52560082-52687374 (-) // 90.81 // q13.2                                                                                                           | up |
| 11724673_a_at | BCKDHB                     | 594                    | chr6:80816343-81055987 (+) // 98.54 // q14.1                                                                                                            | up |
| 11740374_a_at | BCL2L14                    | 79370                  | chr12:12223872-12252625 (+) // 97.83 // p13.2                                                                                                           | up |
| 11731176_at   | BCL2L15                    | 440603                 | chr1:114419611-114430203 (-) // 63.29 // p13.2                                                                                                          | up |
| 11716823_s_at | BDH2                       | 56898                  | chr6:99622547-99625462 (+) // 66.58 // q16.2 ///<br>chr4:103998764-104021064 (-) // 75.83 // q24                                                        | up |
| 11716822_a_at | BDH2 ///<br>NHEDC2         | 133308 ///<br>56898    | chr6:99622547-99625462 (+) // 66.58 // q16.2 ///<br>chr4:103998764-104021064 (-) // 75.83 // q24                                                        | up |
| 11763406_s_at | BICC1                      | 80114                  | chr10:60588982-60591183 (+) // 98.52 // q21.1                                                                                                           | up |
| 11722953_a_at | BIK                        | 638                    | chr22:43506753-43525718 (+) // 90.79 // q13.2                                                                                                           | up |
| 11717008_a_at | BNIP3L                     | 665                    | chr8:26240413-26270641 (+) // 97.27 // p21.2                                                                                                            | up |
| 11723422_s_at | BTF3L4                     | 91408                  | chr1:52521801-52554585 (+) // 87.15 // p32.3 ///<br>chr2:159860161-159861230 (+) // 33.65 // q24.2 ///<br>chr21:18889276-18891379 (-) // 69.07 // q21.1 | up |
| 11723420_s_at | BTF3L4 ///<br>LOC100505945 | 100505945<br>/// 91408 | chr1:52521801-52554585 (+) // 87.15 // p32.3 ///<br>chr2:159860161-159861230 (+) // 33.65 // q24.2 ///<br>chr21:18889276-18891379 (-) // 69.07 // q21.1 | up |
| 11724786_s_at | C14orf129                  | 51527                  | chr14:96830716-96853623 (+) // 83.97 // q32.2                                                                                                           | up |
| 11736067_a_at | C15orf63 ///<br>SERF2      | 10169 ///<br>25764     | chr15:44092348-44094767 (+) // 80.41 // q15.3                                                                                                           | up |
| 11736916_a_at | C17orf58                   | 284018                 | chr17:65987217-65989765 (-) // 85.22 // q24.2                                                                                                           | up |
| 11736304_a_at | C17orf91                   | 84981                  | chr17:1615081-1619504 (-) // 43.15 // p13.3                                                                                                             | up |
| 11742699_a_at | C1R                        | 715                    | chr12:7187512-7245065 (-) // 89.76 // p13.31                                                                                                            | up |
| 11741160_a_at | C1orf26                    | 54823                  | chr1:185126290-185260912 (+) // 99.07 // q25.3                                                                                                          | up |
| 11756435_a_at | C1orf85                    | 112770                 | chr1:156262486-156265468 (-) // 98.24 // q22                                                                                                            | up |
| 11754909_a_at | C2orf88                    | 84281                  | chr2:191045164-191064935 (+) //                                                                                                                         | up |



|               |          |        |                                                       |    |
|---------------|----------|--------|-------------------------------------------------------|----|
| 11728449_at   | C3orf57  | 165679 | 95.76 // q32.2<br>chr3:161062583-161090668 (-) //     | up |
| 11734497_at   | C6orf222 | 389384 | 89.23 // q26.1<br>chr6:36283533-36304662 (-) // 83.29 | up |
| 11723151_s_at | C7orf10  | 79783  | // p21.31<br>chr7:40174480-40900357 (+) // 87.42      | up |
| 11721984_at   | C7orf29  | 113763 | // p14.1<br>chr7:150026875-150029810 (+) //           | up |
| 11751867_a_at | C8orf59  | 401466 | 95.13 // q36.1<br>chr8:86129391-86132569 (-) // 77.09 | up |
| 11721568_a_at | C9orf3   | 84909  | // q21.2<br>chr9:97488714-97849500 (+) // 80.89       | up |
| 11754856_a_at | CA12     | 771    | // q22.32<br>chr15:63616905-63674075 (-) //           | up |
| 11723517_a_at | CAB39L   | 81617  | 96.41 // q22.2<br>chr13:49882785-49975735 (-) //      | up |
| 11758576_s_at | CCDC59   | 29080  | 99.35 // q14.2<br>chr12:82746089-82746492 (-) //      | up |
| 11724828_at   | CCL20    | 6364   | 38.73 // q21.31<br>chr2:228678557-228682272 (+) //    | up |
| 11755103_a_at | CDA      | 978    | 95.97 // q36.3<br>chr1:20915440-20945385 (+) // 84.46 | up |
| 11729118_a_at | CDKN1C   | 1028   | // p36.12<br>chr11:2904447-2907111 (-) // 79.41 //    | up |
| 11736163_a_at | CDKN2B   | 1030   | p15.4<br>chr9:22002902-22009385 (-) // 92.07          | up |
| 11739039_x_at | CEACAM5  | 1048   | // p21.3<br>chr19:42212503-42628368 (+) //            | up |
| 11725980_at   | CFD      | 1675   | 63.96 // q13.2<br>chr19:859452-863750 (+) // 72.29 // | up |
| 11718118_s_at | CFL2     | 1073   | p13.3<br>chr14:35179587-35183906 (-) //               | up |
| 11724885_at   | CLIC3    | 9022   | 96.82 // q13.1<br>chr9:139889082-139891017 (-) //     | up |
| 11754675_a_at | CLIP4    | 79745  | 91.69 // q34.3<br>chr2:29337743-29397580 (+) // 95.92 | up |
| 11716638_s_at | COL4A1   | 1282   | // p23.2<br>chr13:110801310-110959496 (-) //          | up |
| 11729128_at   | CPA4     | 51200  | 99.04 // q34<br>chr7:129932973-129964014 (+) //       | up |
| 11730761_s_at | CRIPT    | 9419   | 85.97 // q32.2<br>chr2:46844289-46852883 (+) // 77.97 | up |
| 11722981_a_at | CSPG5    | 10675  | // p21<br>chr3:47603728-47622282 (-) // 91.86         | up |
| 11734776_a_at | CTTN     | 2017   | // p21.31<br>chr11:70244635-70282681 (+) //           | up |
| 11758000_s_at | CXADR    | 1525   | 97.33 // q13.3<br>chr21:18938820-18939264 (+) //      | up |
|               |          |        | 97.16 // q21.1 ///                                    |    |
|               |          |        | chr21:15050246-15050713 (+) //                        |    |
|               |          |        | 92.12 // q11.2 ///                                    |    |
|               |          |        | chr15:22014422-22014890 (-) //                        |    |
|               |          |        | 91.68 // q11.2 ///                                    |    |

|               |             |            |                                                    |    |
|---------------|-------------|------------|----------------------------------------------------|----|
|               |             |            | chr15:21007759-21008227 (-) // 91.03 // q11.2 ///  |    |
|               |             |            | chr18:14476890-14477357 (-) // 91.25 // p11.21     |    |
| 11753586_s_at | CXADR ///   | 1525 ///   | chr21:18885447-18937933 (+) // 99.83 // q21.1 ///  | up |
|               | CXADRP2 /// | 440224 /// | chr21:15048342-15049360 (+) // 93.86 // q11.2 ///  |    |
|               | CXADRP3     | 646243     | chr15:21009115-21010134 (-) // 95.69 // q11.2 ///  |    |
|               |             |            | chr15:22015778-22016796 (-) // 95.19 // q11.2 ///  |    |
|               |             |            | chr18:14478243-14479266 (-) // 95.36 // p11.21     |    |
| 11719366_s_at | CXCL1       | 2919       | chr4:74735118-74737019 (+) // 97.29 // q13.3       | up |
| 11744128_x_at | CXCL2       | 2920       | chr4:74962676-74965002 (-) // 94.46 // q13.3       | up |
| 11728477_at   | CXCL3       | 2921       | chr4:74902305-74904523 (-) // 91.73 // q13.3       | up |
| 11750061_x_at | DAZAP2      | 9802       | chr12:51632607-51636608 (+) // 99.32 // q13.13 /// | up |
|               |             |            | chr2:203065740-203066692 (-) // 93.78 // q33.1     |    |
| 11719738_at   | DCP2        | 167227     | chr5:112312398-112356761 (+) // 96.56 // q22.2     | up |
| 11723899_a_at | DHRS9       | 10170      | chr2:169921298-169952677 (+) // 85.44 // q31.1     | up |
| 11724848_a_at | DIXDC1      | 85458      | chr11:111807926-111893374 (+) // 93.97 // q23.1    | up |
| 11727900_at   | DMRT1       | 1761       | chr9:841644-969090 (+) // 96.33 // p24.3           | up |
| 11737097_a_at | DSC2        | 1824       | chr18:28645943-28682388 (-) // 96.68 // q12.1      | up |
| 11753617_a_at | DUSP3       | 1845       | chr17:41846976-41856292 (-) // 100.0 // q21.31     | up |
| 11724575_at   | ECE2        | 9718       | chr3:183967385-183977406 (+) // 93.77 // q27.1     | up |
| 11726023_a_at | EDN1        | 1906       | chr6:12290311-12297426 (+) // 98.8 // p24.1        | up |
| 11718830_s_at | EHD1        | 10938      | chr11:64620202-64646230 (-) // 96.8 // q13.1       | up |
| 11717594_s_at | ELF3        | 1999       | chr1:201979689-201986311 (+) // 91.6 // q32.1      | up |
| 11759423_at   | EPPK1       | 83481      | chr8:144939496-144947470 (-) // 49.29 // q24.3     | up |
| 11758563_at   | FAM119A     | 151194     | chr2:208477464-208477880 (-) // 98.81 // q33.3     | up |
| 11739380_a_at | FAM198B     | 51313      | chr4:159045625-159093888 (-) // 98.11 // q32.1     | up |
| 11737653_a_at | FAM26D      | 221301     | chr6:116850194-116880031 (+) // 84.83 // q22.1     | up |
| 11722236_at   | FBXO2       | 26232      | chr1:11708417-11714890 (-) // 83.32                | up |

|               |                               |                       |                                                                                                      |    |
|---------------|-------------------------------|-----------------------|------------------------------------------------------------------------------------------------------|----|
| 11739518_a_at | FLRT3                         | 23767                 | // p36.22<br>chr20:14303922-14318313 (-) // 83.23 // p12.1                                           | up |
| 11717930_x_at | FOLR1                         | 2348                  | chr11:71901257-71907345 (+) // 96.59 // q13.4                                                        | up |
| 11716131_s_at | FSTL3                         | 10272                 | chr19:676390-683484 (+) // 96.51 // p13.3                                                            | up |
| 11732322_at   | FXN                           | 2395                  | chr9:71650174-71689099 (+) // 73.82 // q21.11                                                        | up |
| 11715479_a_at | GABARAP                       | 11337                 | chr17:7143388-7146437 (-) // 97.64 // p13.1                                                          | up |
| 11728763_x_at | GAL3ST4                       | 79690                 | chr7:99756866-99766373 (-) // 85.82 // q22.1                                                         | up |
| 11748926_a_at | GANAB                         | 23193                 | chr11:62392903-62407205 (-) // 89.75 // q12.3                                                        | up |
| 11716814_s_at | GATM                          | 2628                  | chr15:45653321-45672321 (-) // 80.14 // q21.1                                                        | up |
| 11730481_a_at | GJB6                          | 10804                 | chr13:20796101-20806732 (-) // 96.35 // q12.11                                                       | up |
| 11715721_a_at | GOLM1                         | 51280                 | chr9:88640937-88714502 (-) // 94.82 // q21.33                                                        | up |
| 11731538_a_at | GPR110                        | 266977                | chr6:46967812-47010099 (-) // 97.04 // p12.3                                                         | up |
| 11742775_a_at | GPR161                        | 23432                 | chr1:168053321-168105624 (-) // 91.29 // q24.2                                                       | up |
| 11737992_s_at | GPR37                         | 2861                  | chr7:124386115-124405681 (-) // 96.63 // q31.33                                                      | up |
| 11719762_a_at | GPSM1                         | 26086                 | chr9:139221931-139254052 (+) // 93.15 // q34.3                                                       | up |
| 11754760_a_at | GRAMD1A                       | 57655                 | chr19:35485687-35517375 (+) // 97.25 // q13.11                                                       | up |
| 11745074_a_at | GSTA4                         | 2941                  | chr6:52842753-52850383 (-) // 75.3 // p12.2                                                          | up |
| 11722903_s_at | GSTT2 ///<br>GSTT2B           | 2953 ///<br>653689    | chr22:24322338-24326106 (+) // 68.89 // q11.23 ///<br>chr22:24299600-24303368 (-) // 68.82 // q11.23 | up |
| 11752897_a_at | HBP1                          | 26959                 | chr7:106809447-106842011 (+) // 100.0 // q22.3                                                       | up |
| 11721473_a_at | HCCS                          | 3052                  | chrX:11129417-11141195 (+) // 91.07 // p22.2                                                         | up |
| 11736244_s_at | HIST1H2AC                     | 8334                  | chr6:26124396-26138605 (+) // 90.6 // p22.2                                                          | up |
| 11738058_s_at | HIST1H2AD                     | 3013                  | chr6:26198964-26199521 (-) // 100.0 // p22.2                                                         | up |
| 11741704_x_at | HIST1H2BC                     | 8347                  | chr6:26123583-26124154 (-) // 100.0 // p22.2                                                         | up |
| 11759760_s_at | HIST1H2BC ///<br>LOC100506979 | 100506979<br>/// 8347 | chr6:26115113-26124154 (-) // 84.91 // p22.2                                                         | up |
| 11724021_at   | HIST1H2BD                     | 3017                  | chr6:26158348-26171577 (+) // 96.22 // p22.2                                                         | up |
| 11741186_at   | HIST1H3D                      | 8351                  | chr6:26196982-26199521 (-) // 77.41 // p22.2                                                         | up |

|               |                                 |                    |                                                                                                            |    |
|---------------|---------------------------------|--------------------|------------------------------------------------------------------------------------------------------------|----|
| 11742688_s_at | HIST2H2AA3<br>///<br>HIST2H2AA4 | 723790 ///<br>8337 | chr1:149822467-149823195 (+) //<br>88.54 // q21.2 ///<br>chr1:149813750-149814478 (-) //<br>88.54 // q21.2 | up |
| 11717090_a_at | HIST2H2BE                       | 8349               | chr1:149856011-149859515 (-) //<br>87.27 // q21.2                                                          | up |
| 11742669_s_at | HIST2H4A ///<br>HIST2H4B        | 554313 ///<br>8370 | chr1:149804220-149804616 (+) //<br>100.0 // q21.2 ///<br>chr1:149832329-149832725 (-) //<br>100.0 // q21.2 | up |
| 11744829_s_at | HLA-E                           | 3133               | chr6:30457289-30460789 (+) // 79.68<br>// p21.33                                                           | up |
| 11759794_at   | HSD17B12                        | 51144              | chr11:43702277-43776952 (+) //<br>39.15 // p11.2                                                           | up |
| 11739252_x_at | HSD3B1                          | 3283               | chr1:120049832-120057681 (+) //<br>97.55 // p12                                                            | up |
| 11717903_s_at | IER3IP1                         | 51124              | chr18:44681412-44702735 (-) //<br>93.75 // q21.1                                                           | up |
| 11729742_x_at | IFI27L2                         | 83982              | chr14:94594132-94595986 (-) //<br>84.83 // q32.12                                                          | up |
| 11755606_x_at | IFI30                           | 10437              | chr19:18288661-18288927 (+) //<br>95.34 // p13.11                                                          | up |
| 11721874_at   | IFIT2                           | 3433               | chr10:91061522-91069032 (+) //<br>97.51 // q23.31                                                          | up |
| 11718025_at   | IL1R1                           | 3554               | chr2:102721033-102796334 (+) //<br>93.64 // q12.1                                                          | up |
| 11754026_a_at | IL8                             | 3576               | chr4:74606280-74608177 (+) // 70.26<br>// q13.3                                                            | up |
| 11719141_a_at | INSIG2                          | 51141              | chr2:118845998-118868679 (+) //<br>81.89 // q14.2                                                          | up |
| 11724668_at   | INSL4                           | 3641               | chr9:5231401-5235528 (+) // 89.08 //<br>p24.1                                                              | up |
| 11720209_at   | IRF9                            | 10379              | chr14:24630261-24635774 (+) //<br>96.44 // q12                                                             | up |
| 11756806_a_at | ISG20                           | 3669               | chr15:89182193-89198847 (+) //<br>44.44 // q26.1                                                           | up |
| 11719292_a_at | ITGB1BP1                        | 9270               | chr2:9545809-9563695 (-) // 98.95 //<br>p25.1                                                              | up |
| 11725806_at   | KCNJ8                           | 3764               | chr12:21917889-21927754 (-) //<br>99.13 // p12.1                                                           | up |
| 11736458_x_at | KCNK6                           | 9424               | chr19:38810468-38819553 (+) //<br>56.19 // q13.2                                                           | up |
| 11731580_x_at | KCTD20                          | 222658             | chr6:36410543-36458918 (+) // 85.4<br>// p21.31                                                            | up |
| 11719928_a_at | KDM5B                           | 10765              | chr1:202696344-202778598 (-) //<br>90.96 // q32.1                                                          | up |
| 11731363_a_at | KLC3                            | 147700             | chr19:45843997-45854778 (+) //<br>93.68 // q13.32                                                          | up |
| 11729691_a_at | KLHL24                          | 54800              | chr3:183353355-183402302 (+) //<br>90.88 // q27.1                                                          | up |
| 11732196_x_at | KPNA4                           | 3840               | chr3:160217420-160283376 (-) //<br>97.08 // q25.33                                                         | up |
| 11722835_a_at | KPTN                            | 11133              | chr19:47978406-47987531 (-) //                                                                             | up |

|               |           |        |                                                    |    |
|---------------|-----------|--------|----------------------------------------------------|----|
| 11728308_at   | KRT20     | 54474  | 89.22 // q13.32<br>chr17:39032147-39041495 (-) //  | up |
| 11738301_at   | KRTAP3-1  | 83896  | 97.93 // q21.2<br>chr17:39164775-39165366 (-) //   | up |
| 11738427_at   | KRTAP4-1  | 85285  | 96.25 // q21.2<br>chr17:39340356-39341600 (-) //   | up |
| 11746635_a_at | LEF1      | 51176  | 91.76 // q21.2<br>chr4:108969365-109088923 (-) //  | up |
| 11721237_a_at | LHFPL2    | 10184  | 93.75 // q25<br>chr5:77781052-77944648 (-) // 95.8 | up |
| 11760084_x_at | LOC254896 | 254896 | // q14.1<br>chr8:22941867-22961063 (+) // 77.45    | up |
| 11746708_at   | LOC389834 | 389834 | // p21.3<br>chr2:95526395-95532937 (+) // 68.15    | up |
|               |           |        | // q11.1 /// chr21:9916851-9923445                 |    |
|               |           |        | (-) // 72.41 // p11.2 ///                          |    |
|               |           |        | chr4_gl000194_random:63252-69842                   |    |
|               |           |        | (-) // 71.99 // ///                                |    |
|               |           |        | chrY:13319117-13325698 (-) // 71.04                |    |
|               |           |        | // q11.1                                           |    |
| 11763340_s_at | LOC642852 | 642852 | chr21:46714863-46716111 (+) //                     | up |
|               |           |        | 31.59 // q22.3                                     |    |
| 11746283_s_at | LOC730755 | 730755 | chr17:39215494-39216366 (-) //                     | up |
|               |           |        | 94.12 // q21.2                                     |    |
| 11717464_at   | LXN       | 56925  | chr3:158383817-158390482 (-) //                    | up |
|               |           |        | 96.82 // q25.32                                    |    |
| 11728507_at   | LY96      | 23643  | chr8:74903586-74941314 (+) // 77.76                | up |
|               |           |        | // q21.11                                          |    |
| 11733938_x_at | LYPLA2    | 11313  | chr1:24117624-24122027 (+) // 96.62                | up |
|               |           |        | // p36.11 ///                                      |    |
|               |           |        | chr6:33332515-33334135 (-) // 92.53                |    |
|               |           |        | // p21.32                                          |    |
| 11745723_a_at | MALAT1    | 378938 | chr11:65265232-65273937 (+) //                     | up |
|               |           |        | 94.71 // q13.1                                     |    |
| 11739372_a_at | MAPRE2    | 10982  | chr18:32558207-32723430 (+) // 98.8                | up |
|               |           |        | // q12.1                                           |    |
| 11724471_x_at | MGST1     | 4257   | chr12:16500587-16517400 (+) //                     | up |
|               |           |        | 88.42 // p12.3                                     |    |
| 11755719_a_at | MLLT11    | 10962  | chr1:151032880-151040969 (+) //                    | up |
|               |           |        | 99.93 // q21.3                                     |    |
| 11743691_a_at | MRPL30    | 51263  | chr2:99797577-99814089 (+) // 99.4                 | up |
|               |           |        | // q11.2                                           |    |
| 11723056_a_at | MRPL33    | 9553   | chr2:27994583-28002601 (+) // 79.51                | up |
|               |           |        | // p23.2                                           |    |
| 11726608_s_at | MTF2      | 22823  | chr1:93544794-93604631 (+) // 98.38                | up |
|               |           |        | // p22.1                                           |    |
| 11724833_at   | MUC13     | 56667  | chr3:124624288-124646840 (-) //                    | up |
|               |           |        | 93.49 // q21.2                                     |    |
| 11754299_a_at | MXD4      | 10608  | chr4:2249158-2258477 (-) // 91.34 //               | up |
|               |           |        | p16.3                                              |    |
| 11738617_s_at | MYO7A     | 4647   | chr11:76839315-76926284 (+) //                     | up |
|               |           |        | 99.58 // q13.5                                     |    |
| 11725335_s_at | MZT1      | 440145 | chr13:73282504-73302001 (-) //                     | up |

|               |           |        |                                                           |    |
|---------------|-----------|--------|-----------------------------------------------------------|----|
| 11745183_a_at | NAA15     | 80155  | 96.63 // q21.33<br>chr4:140222654-140310342 (+) //        | up |
| 11743415_s_at | NDRG4     | 65009  | 91.62 // q31.1<br>chr16:58497769-58547522 (+) //          | up |
| 11757513_at   | NFKBIZ    | 64332  | 93.27 // q21<br>chr3:101579157-101580117 (+) //           | up |
| 11735764_a_at | NOSTRIN   | 115677 | 80.46 // q12.3<br>chr2:169659127-169721564 (+) //         | up |
| 11718965_s_at | NUFIP2    | 57532  | 98.31 // q24.3<br>chr17:27582857-27621166 (-) //          | up |
| 11722015_at   | OLR1      | 4973   | 94.03 // q11.2<br>chr12:10310899-10324802 (-) //          | up |
| 11728681_s_at | PAIP1     | 10605  | 78.55 // p13.2<br>chr17:18553507-18556020 (+) //          | up |
|               |           |        | 84.88 // p11.2 ///<br>chr5:43526368-43557195 (-) // 96.94 |    |
| 11722232_a_at | PCP4      | 5121   | // p12<br>chr21:41239242-41301322 (+) //                  | up |
| 11723499_a_at | PCSK9     | 255738 | 95.92 // q22.2<br>chr1:55505065-55530525 (+) // 92.78     | up |
| 11718305_a_at | PDLIM2    | 64236  | // p32.3<br>chr8:22436253-22451811 (+) // 96.25           | up |
| 11759721_a_at | PDXK      | 8566   | // p21.3<br>chr21:45148780-45158741 (+) //                | up |
| 11724779_at   | PGM2L1    | 283209 | 58.96 // q22.3<br>chr11:74041358-74109799 (-) //          | up |
| 11756532_a_at | PIK3CD    | 5293   | 85.87 // q13.4<br>chr1:9711788-9788969 (+) // 79.63 //    | up |
| 11715880_a_at | PITPNA    | 5306   | p36.22<br>chr17:1421133-1466110 (-) // 94.49 //           | up |
| 11730699_at   | PLA2G10   | 8399   | p13.3<br>chr16:14766406-14788526 (-) //                   | up |
|               |           |        | 88.92 // p13.12 ///<br>chr16:14821137-14827644 (-) //     |    |
| 11728421_a_at | PLA2G7    | 7941   | 69.41 // p13.11<br>chr6:46671941-46703153 (-) // 95.83    | up |
| 11728184_a_at | PLEKHA7   | 144100 | // p12.3<br>chr11:16809030-17035963 (-) //                | up |
| 11720452_at   | PLEKHH2   | 130271 | 97.85 // p15.1<br>chr2:43864437-43995126 (+) // 91.53     | up |
| 11746264_a_at | PPAP2A    | 8611   | // p21<br>chr5:54720998-54830503 (-) // 98.62             | up |
| 11763834_a_at | PPP1R1C   | 151242 | // q11.2<br>chr2:182968327-182982644 (+) //               | up |
| 11752589_a_at | PPYR1     | 5540   | 97.53 // q31.3<br>chr10:47083533-47088320 (+) //          | up |
| 11728764_a_at | PVRL4     | 81607  | 99.89 // q11.22<br>chr1:161040780-161059385 (-) //        | up |
| 11724800_a_at | QPRT      | 23475  | 93.16 // q23.3<br>chr16:29690439-29709610 (+) //          | up |
| 11716386_a_at | RAB11FIP5 | 26056  | 69.34 // p11.2<br>chr2:73300509-73340146 (-) // 96.21     | up |
|               |           |        | // p13.2                                                  |    |

|               |               |               |                                                                                                 |    |
|---------------|---------------|---------------|-------------------------------------------------------------------------------------------------|----|
| 11723367_a_at | RAB26         | 25837         | chr16:2198624-2204140 (+) // 94.09 // p13.3                                                     | up |
| 11722789_a_at | RAB5A         | 5868          | chr3:19988570-20026667 (+) // 92.92 // p24.3                                                    | up |
| 11720505_a_at | RAB6B         | 51560         | chr3:133543078-133614691 (-) // 96.1 // q22.1                                                   | up |
| 11716287_at   | RABAC1        | 10567         | chr19:42460834-42463540 (-) // 80.21 // q13.2                                                   | up |
| 11740140_a_at | RASGRP3       | 25780         | chr2:33738941-33789797 (+) // 95.32 // p22.3                                                    | up |
| 11736856_at   | RASL11A       | 387496        | chr13:27844463-27847827 (+) // 96.82 // q12.2                                                   | up |
| 11734527_a_at | RECQL5        | 9400          | chr17:73646441-73663269 (-) // 87.89 // q25.1                                                   | up |
| 11747131_at   | REG4          | 83998         | chr1:120344945-120354203 (-) // 85.5 // p12                                                     | up |
| 11761420_a_at | RGS11         | 8786          | chr16:322258-325937 (-) // 95.42 // p13.3                                                       | up |
| 11742143_s_at | RHCE /// RHD  | 6006 /// 6007 | chr1:25598952-25655519 (+) // 82.27 // p36.11 /// chr1:25688740-25747363 (-) // 98.47 // p36.11 | up |
| 11734359_a_at | RNASEL        | 6041          | chr1:182542771-182558345 (-) // 76.07 // q25.3                                                  | up |
| 11757491_x_at | ROMO1         | 140823        | chr20:34287357-34288899 (+) // 73.56 // q11.22                                                  | up |
| 11743266_a_at | RPL34         | 6164          | chr4:109541748-109551640 (+) // 70.6 // q25                                                     | up |
| 11748854_a_at | RPUSD4        | 84881         | chr11:126072693-126075676 (-) // 88.95 // q24.2                                                 | up |
| 11756025_a_at | S100A13       | 6284          | chr1:153591284-153599673 (-) // 98.09 // q21.3                                                  | up |
| 11733442_x_at | SAA1          | 6288          | chr11:18287771-18291514 (+) // 83.42 // p15.1                                                   | up |
| 11756072_s_at | SAA1 /// SAA2 | 6288 /// 6289 | chr11:18288455-18290866 (+) // 100.0 // p15.1 /// chr11:18267159-18269537 (-) // 99.48 // p15.1 | up |
| 11737184_at   | SAA2          | 6289          | chr11:18260475-18269566 (-) // 44.95 // p15.1                                                   | up |
| 11729749_at   | SAA4          | 6291          | chr11:18252901-18258453 (-) // 78.43 // p15.1                                                   | up |
| 11756872_a_at | SAMD4A        | 23034         | chr14:55241679-55255846 (+) // 98.75 // q22.2                                                   | up |
| 11718932_a_at | SDCBP2        | 27111         | chr20:1290556-1309883 (-) // 99.68 // p13                                                       | up |
| 11725037_a_at | SEC23IP       | 11196         | chr10:121652224-121701833 (+) // 95.15 // q26.11                                                | up |
| 11732334_s_at | SEC31A        | 22872         | chr4:83739467-83812400 (-) // 98.93 // q21.22                                                   | up |
| 11720331_at   | SELM          | 140606        | chr22:31500758-31503874 (-) // 58.0 // q12.2                                                    | up |
| 11715366_a_at | SEPT2         | 4735          | chr2:242255560-242293442 (+) //                                                                 | up |

|               |            |        |                                                        |    |
|---------------|------------|--------|--------------------------------------------------------|----|
| 11720306_at   | SERP1      | 27230  | 85.3 // q37.3<br>chr3:150259779-150264712 (-) //       | up |
| 11743435_a_at | SEZ6L2     | 26470  | 98.88 // q25.1<br>chr16:29882481-29910580 (-) //       | up |
| 11748133_s_at | SLC2A11    | 66035  | 98.57 // p11.2<br>chr22:24199137-24226298 (+) //       | up |
| 11740957_x_at | SLC2A6     | 11182  | 93.75 // q11.23<br>chr9:136336216-136344276 (-) //     | up |
| 11739934_a_at | SLC39A12   | 221074 | 86.18 // q34.2<br>chr10:18240643-18332218 (+) //       | up |
| 11751174_a_at | SLC39A9    | 55334  | 97.96 // p12.33<br>chr14:69865102-69925795 (+) //      | up |
| 11748046_a_at | SLC44A4    | 80736  | 99.93 // q24.1<br>chr6:31831230-31845448 (-) // 97.01  | up |
| 11719222_at   | SPINK1     | 6690   | // p21.33<br>chr5:147204145-147211331 (-) //           | up |
| 11724215_at   | SPRYD4     | 283377 | 70.99 // q32<br>chr12:56862270-56864769 (+) //         | up |
| 11754274_a_at | ST6GALNAC4 | 27090  | 82.47 // q13.3<br>chr9:130670085-130679296 (-) //      | up |
| 11718935_x_at | STK19      | 8859   | 98.56 // q34.11<br>chr6:31938942-31949222 (+) // 98.25 | up |
| 11754293_a_at | STK40      | 83931  | // p21.33<br>chr1:36805228-36811194 (-) // 90.61       | up |
| 11742479_s_at | SULT1C4    | 27233  | // p34.3<br>chr2:108994420-109004270 (+) //            | up |
| 11755671_a_at | SYTL2      | 54843  | 98.86 // q12.3<br>chr11:85405768-85435756 (-) //       | up |
| 11752602_a_at | TBC1D17    | 79735  | 99.79 // q14.1<br>chr19:50380980-50391881 (+) //       | up |
| 11718053_a_at | TBC1D23    | 55773  | 99.78 // q13.33<br>chr3:99979660-100044095 (+) //      | up |
| 11718506_at   | TFF3       | 7033   | 96.18 // q12.1<br>chr21:43731776-43735761 (-) //       | up |
| 11731183_a_at | TFPI       | 7035   | 99.46 // q22.3<br>chr2:188343307-188419219 (-) //      | up |
| 11748279_s_at | TM7SF2     | 7108   | 95.66 // q32.1<br>chr11:64879349-64883856 (+) //       | up |
| 11722310_a_at | TMC4       | 147798 | 99.76 // q13.1<br>chr19:54663845-54676944 (-) //       | up |
| 11716356_at   | TMEM167A   | 153339 | 91.04 // q13.42<br>chr5:82348671-82373315 (-) // 89.99 | up |
| 11732818_at   | TMEM171    | 134285 | // q14.2<br>chr5:72416118-72427641 (+) // 94.05        | up |
| 11742824_a_at | TMEM199    | 147007 | // q13.2<br>chr17:26684603-26689881 (+) //             | up |
| 11732105_at   | TMEM208    | 29100  | 86.83 // q11.2<br>chr16:67261013-67263181 (+) //       | up |
| 11728022_a_at | TMEM45A    | 55076  | 94.64 // q22.1<br>chr3:100211462-100296290 (+) //      | up |
| 11730319_at   | TNFRSF11B  | 4982   | 96.61 // q12.2<br>chr8:119935800-119964439 (-) //      | up |
|               |            |        | 97.84 // q24.12                                        |    |



|               |          |        |                                                                                                                                                     |      |
|---------------|----------|--------|-----------------------------------------------------------------------------------------------------------------------------------------------------|------|
| 11743730_at   | TNFSF10  | 8743   | chr3:172223302-172241297 (-) // 83.68 // q26.31                                                                                                     | up   |
| 11718610_at   | TP53INP1 | 94241  | chr8:95938199-95961726 (-) // 92.51 // q22.1                                                                                                        | up   |
| 11715924_a_at | TRAM1    | 23471  | chr8:71485454-71520714 (-) // 92.64 // q13.3                                                                                                        | up   |
| 11720032_a_at | TRIM29   | 23650  | chr11:119981994-120056148 (-) // 98.13 // q23.3                                                                                                     | up   |
| 11759923_at   | TRIM4    | 89122  | chr7:99500840-99517116 (-) // 35.5 // q22.1                                                                                                         | up   |
| 11732603_a_at | TRIM45   | 80263  | chr1:117653683-117664476 (-) // 90.94 // p13.1                                                                                                      | up   |
| 11744301_a_at | TTC17    | 55761  | chr11:43380434-43516470 (+) // 98.79 // p12                                                                                                         | up   |
| 11744308_a_at | TTC39A   | 22996  | chr1:51752781-51787938 (-) // 97.9 // p32.3                                                                                                         | up   |
| 11725193_at   | TTPAL    | 79183  | chr20:43104531-43123244 (+) // 83.7 // q13.12                                                                                                       | up   |
| 11727362_x_at | TUBA1A   | 7846   | chr12:49663246-49666967 (+) // 72.38 // q13.12 /// chr12:49578573-49582887 (-) // 97.2 // q13.12 /// chr12:49521740-49523506 (-) // 75.19 // q13.12 | up   |
| 11718348_a_at | TUSC2    | 11334  | chr3:50362339-50365647 (-) // 95.24 // p21.31                                                                                                       | up   |
| 11732156_a_at | UFM1     | 51569  | chr13:38923941-38937140 (+) // 93.88 // q13.3                                                                                                       | up   |
| 11729820_at   | USMG5    | 84833  | chr10:105148806-105155780 (-) // 80.55 // q24.33                                                                                                    | up   |
| 11726826_s_at | VPS37D   | 155382 | chr7:73082157-73086440 (+) // 82.07 // q11.23                                                                                                       | up   |
| 11727186_a_at | WNT5A    | 7474   | chr3:55499742-55521670 (-) // 96.72 // p14.3                                                                                                        | up   |
| 11733464_at   | XDH      | 7498   | chr2:31557186-31637611 (-) // 91.57 // p23.1                                                                                                        | up   |
| 11732159_a_at | YIF1A    | 10897  | chr11:66052050-66056626 (-) // 77.52 // q13.2                                                                                                       | up   |
| 11737803_a_at | YIPF2    | 78992  | chr19:11033445-11039360 (-) // 94.37 // p13.2                                                                                                       | up   |
| 11724635_at   | YOD1     | 55432  | chr1:207217193-207224553 (-) // 98.23 // q32.2                                                                                                      | up   |
| 11754869_s_at | ZNF267   | 10308  | chr16:31885118-31928622 (+) // 99.61 // p11.2                                                                                                       | up   |
| 11724634_s_at | ABCB10   | 23456  | chr1:229652328-229694640 (-) // 97.53 // q42.13                                                                                                     | down |
| 11727020_at   | ABI2     | 10152  | chr2:204192993-204296891 (+) // 93.04 // q33.2                                                                                                      | down |
| 11739261_s_at | ACSL3    | 2181   | chr2:223725659-223808118 (+) // 97.83 // q36.1                                                                                                      | down |
| 11723946_a_at | ACSL5    | 51703  | chr10:114135862-114188138 (+) // 99.25 // q25.2                                                                                                     | down |
| 11722352_s_at | ACTA2    | 59     | chr10:90694832-90712529 (-) //                                                                                                                      | down |

|               |          |        |                                                                                                          |      |
|---------------|----------|--------|----------------------------------------------------------------------------------------------------------|------|
| 11718016_a_at | ADARB1   | 104    | 59.19 // q23.31<br>chr21:46494513-46646475 (+) //<br>96.44 // q22.3                                      | down |
| 11724877_a_at | AEBP2    | 121536 | chr12:19592425-19675324 (+) //<br>84.73 // p12.3                                                         | down |
| 11723781_at   | AGPS     | 8540   | chr2:178257371-178408562 (+)<br>// 96.68 // q31.2                                                        | down |
| 11730253_a_at | AHCTF1   | 25909  | chr1:247002399-247094665 (-) //<br>99.34 // q44 ///<br>chr2:162355653-162364252 (-) //<br>96.35 // q24.2 | down |
| 11725501_at   | AHNAK    | 79026  | chr11:62201017-62314332 (-) //<br>94.06 // q12.3                                                         | down |
| 11733030_s_at | AIDA     | 64853  | chr1:222841356-222885864 (-) //<br>95.98 // q41 ///<br>chr1:78275454-78277620 (-) //<br>68.72 // p31.1   | down |
| 11722671_at   | AKAP11   | 11215  | chr13:42846287-42897399 (+) //<br>96.55 // q14.11                                                        | down |
| 11735363_a_at | AKTIP    | 64400  | chr5:24170298-24172386 (+) //<br>91.32 // p14.2 ///<br>chr16:53525191-53537170 (-) //<br>98.97 // q12.2  | down |
| 11716183_a_at | ALCAM    | 214    | chr3:105085712-105295746 (+)<br>// 96.66 // q13.11                                                       | down |
| 11721796_at   | ALDH9A1  | 223    | chr1:165631452-165668180 (-) //<br>92.26 // q24.1                                                        | down |
| 11743909_at   | ALG14    | 199857 | chr1:95447797-95538507 (-) //<br>85.06 // p21.3                                                          | down |
| 11727577_a_at | ALS2CR4  | 65062  | chr2:202484910-202507686 (-) //<br>72.55 // q33.1                                                        | down |
| 11719004_at   | ANKH     | 56172  | chr5:14704912-14871894 (-) //<br>91.05 // p15.2                                                          | down |
| 11744083_at   | ANKIB1   | 54467  | chr7:91875496-92030697 (+) //<br>99.09 // q21.2                                                          | down |
| 11717691_a_at | ANKRD13A | 88455  | chr12:110437194-110477237 (+)<br>// 97.92 // q24.11                                                      | down |
| 11719904_s_at | ANKRD40  | 91369  | chr17:48770555-48785270 (-) //<br>81.31 // q21.33                                                        | down |
| 11736047_a_at | ANTXR2   | 118429 | chr4:80822772-80994477 (-) //<br>89.23 // q21.21                                                         | down |
| 11730428_a_at | AP1B1    | 162    | chr22:29723670-29784572 (-) //<br>98.62 // q12.2                                                         | down |
| 11746337_a_at | AP1S2    | 8905   | chr17:58177791-58180146 (-) //<br>73.6 // q23.1 ///<br>chrX:15849320-15873100 (-) //<br>89.55 // p22.2   | down |
| 11716261_a_at | AP2B1    | 163    | chr17:33913917-34053436 (+) //<br>94.02 // q12                                                           | down |
| 11756982_x_at | AP3S2    | 10239  | chr15:90377561-90437224 (-) //<br>79.11 // q26.1                                                         | down |
| 11742050_a_at | API5     | 8539   | chr11:43333504-43366080 (+) //<br>97.68 // p12 ///                                                       | down |

|               |          |        |                                                       |      |
|---------------|----------|--------|-------------------------------------------------------|------|
|               |          |        | chr2:178859543-178863598 (-) //<br>88.63 // q31.2 /// |      |
|               |          |        | chrX:115235618-115239750 (-) //<br>93.17 // q23       |      |
| 11741256_s_at | APOBEC3F | 200316 | chr22:39436672-39451973 (+) //<br>43.37 // q13.1      | down |
| 11732243_at   | APOL6    | 80830  | chr22:36044416-36064407 (+) //<br>18.3 // q12.3       | down |
| 11717791_a_at | APPL2    | 55198  | chr12:105567074-105630010 (-)<br>// 94.15 // q23.3    | down |
| 11730288_at   | ARHGAP5  | 394    | chr14:32546494-32628932 (+) //<br>98.56 // q12        | down |
| 11747512_s_at | ARHGDIA  | 396    | chr17:79826597-79827833 (-) //<br>86.17 // q25.3      | down |
| 11717697_at   | ARIH1    | 25820  | chr15:72766666-72879692 (+) //<br>95.31 // q24.1      | down |
| 11732331_s_at | ARL4C    | 10123  | chr2:235401687-235405693 (-) //<br>93.35 // q37.1     | down |
| 11720466_a_at | ARL6IP1  | 23204  | chr16:18802988-18812871 (-) //<br>95.48 // p12.3      | down |
| 11721254_s_at | ARMCX3   | 51566  | chrX:100877786-100882833 (+)<br>// 76.42 // q22.1     | down |
| 11735058_a_at | ARNT2    | 9915   | chr15:80696691-80890269 (+) //<br>97.98 // q25.1      | down |
| 11718724_at   | ARRDC3   | 57561  | chr5:90664540-90679176 (-) //<br>96.24 // q14.3       | down |
| 11719761_at   | ARRDC4   | 91947  | chr15:98503925-98517063 (+) //<br>98.54 // q26.3      | down |
| 11748793_a_at | ASNS     | 440    | chr7:97481515-97501764 (-) //<br>99.51 // q21.3       | down |
| 11739367_at   | ASPH     | 444    | chr8:62413114-62627199 (-) //<br>97.56 // q12.3       | down |
| 11742832_a_at | ASPM     | 259266 | chr1:197053259-197115824 (-) //<br>97.69 // q31.3     | down |
| 11719157_x_at | ASRGL1   | 80150  | chr11:62104773-62160884 (+) //<br>93.03 // q12.3      | down |
| 11725722_at   | ATAD2    | 29028  | chr8:124332089-124408705 (-) //<br>96.45 // q24.13    | down |
| 11758854_at   | ATL3     | 25923  | chr11:63391553-63439385 (-) //<br>84.44 // q12.3      | down |
| 11739489_a_at | ATP10D   | 57205  | chr4:47487409-47595503 (+) //<br>96.22 // p12         | down |
| 11743863_a_at | ATP2B1   | 490    | chr12:89981825-90049887 (-) //<br>95.6 // q21.33      | down |
| 11728554_at   | ATP6V1E2 | 90423  | chr2:46738985-46747176 (-) //<br>68.68 // p21         | down |
| 11720573_at   | ATP8B1   | 5205   | chr18:55313675-55399039 (-) //<br>90.46 // q21.31     | down |
| 11726362_a_at | ATXN3    | 4287   | chr14:92524711-92563182 (-) //<br>72.91 // q32.12     | down |
| 11754286_a_at | BCL7B    | 9275   | chr11:93212995-93214785 (-) //<br>35.92 // q21 ///    | down |
|               |          |        | chr7:72950685-72954275 (-) //                         |      |

|               |           |        |                                                                                                        |      |
|---------------|-----------|--------|--------------------------------------------------------------------------------------------------------|------|
| 11740143_s_at | BEND6     | 221336 | 43.67 // q11.23<br>chr6:56819772-56892133 (+) //<br>98.43 // p12.1                                     | down |
| 11747720_a_at | BIRC5     | 332    | chr17:76210323-76220336 (+) //<br>96.87 // q25.3                                                       | down |
| 11716289_a_at | BLOC1S1   | 2647   | chr12:56109819-56113487 (+) //<br>66.16 // q13.2                                                       | down |
| 11759213_at   | BMP8B     | 656    | chr1:40222854-40254533 (-) //<br>83.91 // p34.2                                                        | down |
| 11728699_at   | BMPR2     | 659    | chr2:203240944-203432467 (+)<br>// 89.64 // q33.1                                                      | down |
| 11726529_s_at | BRCC3     | 79184  | chr5:175735057-175736566 (+)<br>// 30.45 // q35.2 //<br>chrX:154299694-154350025 (+)<br>// 33.6 // q28 | down |
| 11728438_a_at | BRWD1     | 54014  | chr21:40557818-40685556 (-) //<br>98.43 // q22.2                                                       | down |
| 11718056_a_at | BTBD3     | 22903  | chr20:11898012-11907242 (+) //<br>98.37 // p12.2                                                       | down |
| 11726307_at   | C10orf84  | 63877  | chr10:120068571-120101783 (-)<br>// 87.03 // q26.11                                                    | down |
| 11758960_at   | C11orf30  | 56946  | chr11:76155966-76264109 (+) //<br>90.27 // q13.5                                                       | down |
| 11718671_a_at | C11orf49  | 79096  | chr11:46958117-47183798 (+) //<br>93.04 // p11.2                                                       | down |
| 11757934_at   | C12orf35  | 55196  | chr12:32145679-32146041 (+) //<br>99.72 // p11.21                                                      | down |
| 11740887_a_at | C13orf23  | 80209  | chr13:39584002-39612252 (-) //<br>99.55 // q13.3                                                       | down |
| 11718413_a_at | C14orf166 | 51637  | chr14:52456192-52471414 (+) //<br>88.31 // q22.1                                                       | down |
| 11726885_s_at | C15orf41  | 84529  | chr15:36936477-37102449 (+) //<br>91.86 // q14                                                         | down |
| 11726209_a_at | C17orf76  | 388341 | chr17:16344924-16395524 (-) //<br>90.67 // p11.2                                                       | down |
| 11729886_at   | C18orf54  | 162681 | chr18:51885170-51908404 (+) //<br>98.04 // q21.2                                                       | down |
| 11744918_a_at | C19orf12  | 83636  | chr19:30192074-30206170 (-) //<br>63.8 // q12                                                          | down |
| 11720143_at   | C1orf96   | 126731 | chr1:229456758-229478745 (-) //<br>90.15 // q42.13                                                     | down |
| 11725804_a_at | C21orf91  | 54149  | chr21:19161290-19191703 (-) //<br>97.48 // q21.1                                                       | down |
| 11722046_at   | C2orf43   | 60526  | chr2:20884577-21022883 (-) //<br>97.76 // p24.1                                                        | down |
| 11728857_at   | C3orf34   | 84984  | chr3:196433148-196439159 (-) //<br>82.36 // q29                                                        | down |
| 11741631_a_at | C3orf58   | 205428 | chr3:143691922-143711209 (+)<br>// 96.04 // q24                                                        | down |
| 11737948_a_at | C5        | 727    | chr9:123714615-123812549 (-) //<br>99.54 // q33.2                                                      | down |
| 11727287_at   | C5orf34   | 375444 | chr5:43486807-43515273 (-) //<br>96.73 // p12                                                          | down |

|               |                     |                    |                                                    |      |
|---------------|---------------------|--------------------|----------------------------------------------------|------|
| 11718824_at   | C5orf53             | 492311             | chr5:139505159-139508977 (+)<br>// 84.97 // q31.3  | down |
| 11729201_at   | C6orf120            | 387263             | chr6:170102215-170106454 (+)<br>// 98.02 // q27    | down |
| 11715978_a_at | C6orf48             | 50854              | chr6:31802384-31807541 (+) //<br>92.69 // p21.33   | down |
| 11724103_x_at | C8orf44 ///<br>SGK3 | 23678 ///<br>56260 | chr8:67624652-67774257 (+) //<br>83.03 // q13.1    | down |
| 11718674_a_at | C9orf5              | 23731              | chr9:111777431-111882230 (-) //<br>82.14 // q31.3  | down |
| 11721829_at   | C9orf78             | 51759              | chr9:132589402-132597580 (-) //<br>82.74 // q34.11 | down |
| 11751620_a_at | C9orf86             | 55684              | chr9:139702394-139726891 (+)<br>// 92.93 // q34.3  | down |
| 11733708_a_at | CADPS               | 8618               | chr3:62384022-62861064 (-) //<br>96.66 // p14.2    | down |
| 11722530_a_at | CALD1               | 800                | chr7:134464170-134655474 (+)<br>// 95.19 // q33    | down |
| 11724759_s_at | CALM1               | 801                | chr14:90863372-90874612 (+) //<br>97.04 // q32.11  | down |
| 11720416_a_at | CAMSAP1             | 157922             | chr9:138700332-138799005 (-) //<br>99.31 // q34.3  | down |
| 11748404_s_at | CAMSAP1L1           | 23271              | chr1:200708906-200829829 (+)<br>// 98.88 // q32.1  | down |
| 11738895_at   | CAPN10              | 11132              | chr2:241526151-241557122 (+)<br>// 32.06 // q37.3  | down |
| 11759328_at   | CASC5               | 57082              | chr15:40886217-40956537 (+) //<br>96.86 // q15.1   | down |
| 11720035_s_at | CASP2               | 835                | chr7:142985307-143004789 (+)<br>// 72.07 // q34    | down |
| 11722585_a_at | CAST                | 831                | chr5:95997940-96110383 (+) //<br>97.41 // q15      | down |
| 11726010_at   | CBR4                | 84869              | chr4:169908740-169931468 (-) //<br>93.31 // q32.3  | down |
| 11754967_s_at | CBX3                | 11335              | chr7:26241368-26252974 (+) //<br>86.88 // p15.2    | down |
| 11716276_a_at | CBX5                | 23468              | chr12:54624727-54653329 (-) //<br>86.67 // q13.13  | down |
| 11758793_at   | CCDC109B            | 55013              | chr4:110481353-110609882 (+) //<br>96.28 // q25    | down |
| 11718298_a_at | CCDC25              | 55246              | chr8:27590834-27630170 (-) //<br>98.72 // p21.1    | down |
| 11719949_a_at | CCDC99              | 54908              | chr5:169010361-169031782 (+)<br>// 71.88 // q35.1  | down |
| 11723939_a_at | CCNB1               | 891                | chr5:68462836-68474067 (+) //<br>90.74 // q13.2    | down |
| 11723930_at   | CCT5                | 22948              | chr5:10250281-10267258 (+) //<br>89.37 // p15.2    | down |
| 11737913_s_at | CCT7                | 10574              | chr2:73461404-73480147 (+) //<br>98.99 // p13.2    | down |
| 11735329_a_at | CD47                | 961                | chr3:107761938-107809935 (-) //<br>94.48 // q13.12 | down |
| 11718100_s_at | CD59                | 966                | chr11:33724555-33744276 (-) //                     | down |

|               |          |        |                                                                                                         |      |
|---------------|----------|--------|---------------------------------------------------------------------------------------------------------|------|
| 11759740_x_at | CDC23    | 8697   | 84.95 // p13<br>chr5:137541560-137549033 (-) //<br>84.99 // q31.2                                       | down |
| 11743402_at   | CDC27    | 996    | chr17:45195068-45266663 (-) //<br>94.09 // q21.32                                                       | down |
| 11741540_a_at | CDC42BPA | 8476   | chr1:227177566-227505826 (-) //<br>96.34 // q42.13                                                      | down |
| 11732057_a_at | CDC7     | 8317   | chr1:91966403-91991321 (+) //<br>93.73 // p22.2                                                         | down |
| 11758478_s_at | CDCA7    | 83879  | chr2:174233163-174233630 (+)<br>// 99.79 // q31.1                                                       | down |
| 11729579_at   | CDH13    | 1012   | chr16:82660568-83830201 (+) //<br>91.69 // q23.3                                                        | down |
| 11745843_a_at | CDK1     | 983    | chr10:62538247-62555217 (+) //<br>85.06 // q21.2                                                        | down |
| 11720622_a_at | CDK16    | 5127   | chrX:47078075-47089396 (+) //<br>93.74 // p11.23                                                        | down |
| 11741208_a_at | CDK2     | 1017   | chr12:56360555-56366567 (+) //<br>97.44 // q13.2                                                        | down |
| 11753378_a_at | CDK4     | 1019   | chr12:58142302-58146109 (-) //<br>100.0 // q14.1                                                        | down |
| 11763387_s_at | CDK8     | 1024   | chr13:26978833-26979372 (+) //<br>98.18 // q12.13                                                       | down |
| 11758661_s_at | CDKN2C   | 1031   | chr1:51440006-51440305 (+) //<br>100.0 // p32.3                                                         | down |
| 11753880_x_at | CDKN3    | 1033   | chr14:54866610-54886834 (+) //<br>95.98 // q22.2                                                        | down |
| 11719642_at   | CDS1     | 1040   | chr4:85504056-85572487 (+) //<br>97.44 // q21.23                                                        | down |
| 11717693_at   | CEBPG    | 1054   | chr19:33864235-33873592 (+) //<br>95.15 // q13.11                                                       | down |
| 11743296_a_at | CENPF    | 1063   | chr1:214776527-214837920 (+)<br>// 99.15 // q41                                                         | down |
| 11739328_x_at | CENPH    | 64946  | chr5:68485374-68506183 (+) //<br>76.3 // q13.2                                                          | down |
| 11727973_a_at | CENPN    | 55839  | chr16:81039517-81065088 (+) //<br>67.13 // q23.2                                                        | down |
| 11720247_a_at | CEP55    | 55165  | chr10:95256356-95288851 (+) //<br>95.49 // q23.33                                                       | down |
| 11762596_a_at | CEP57L1  | 285753 | chr10:72149121-72149922 (+) //<br>40.09 // q22.1 ///<br>chr6:109416360-109477999 (+)<br>// 80.69 // q21 | down |
| 11757453_s_at | CEP68    | 23177  | chr2:65313535-65314137 (+) //<br>99.18 // p14                                                           | down |
| 11728361_a_at | CHCHD7   | 79145  | chr8:57124314-57131357 (+) //<br>83.29 // q12.1                                                         | down |
| 11723354_s_at | CHD7     | 55636  | chr8:61591336-61779749 (+) //<br>98.85 // q12.1                                                         | down |
| 11754262_s_at | CHD9     | 80205  | chr16:53357509-53361408 (+) //<br>97.33 // q12.2                                                        | down |
| 11732736_at   | CHSY3    | 337876 | chr5:129240164-129522326 (+)<br>// 95.85 // q23.3                                                       | down |

|               |         |        |                                                                                                                                                                |      |
|---------------|---------|--------|----------------------------------------------------------------------------------------------------------------------------------------------------------------|------|
| 11727821_s_at | CISD1   | 55847  | chr10:60028884-60049563 (+) //<br>93.68 // q21.1                                                                                                               | down |
| 11755868_x_at | CLCC1   | 23155  | chr1:109472560-109506072 (-) //<br>73.61 // p13.3                                                                                                              | down |
| 11729621_at   | CLCN4   | 1183   | chrX:10124872-10205705 (+) //<br>94.17 // p22.2                                                                                                                | down |
| 11719163_a_at | CLCN5   | 1184   | chrX:49687224-49863887 (+) //<br>92.28 // p11.23                                                                                                               | down |
| 11754405_s_at | CLIC4   | 25932  | chr1:25170191-25170766 (+) //<br>91.55 // p36.11 ///<br>chr5:180136520-180137100 (-) //<br>89.47 // q35.3                                                      | down |
| 11722507_a_at | CLIC5   | 53405  | chr6:45866187-46048085 (-) //<br>98.84 // p21.1                                                                                                                | down |
| 11754044_at   | CLSPN   | 63967  | chr1:36200238-36201625 (-) //<br>66.98 // p34.3                                                                                                                | down |
| 11756353_a_at | CLVS1   | 157807 | chr8:62200533-62414428 (+) //<br>99.71 // q12.3                                                                                                                | down |
| 11738807_s_at | CMIP    | 80790  | chr16:81528953-81745365 (+) //<br>94.24 // q23.2                                                                                                               | down |
| 11727420_at   | CNBP    | 7555   | chr3:128886658-128902823 (-) //<br>71.45 // q21.3                                                                                                              | down |
| 11722929_a_at | CNKS3   | 154043 | chr6:154726293-154831803 (-) //<br>99.77 // q25.2                                                                                                              | down |
| 11743297_a_at | CNOT6   | 57472  | chr5:179921403-180005404 (+)<br>// 97.37 // q35.3                                                                                                              | down |
| 11718583_a_at | CNPY2   | 10330  | chr12:56703974-56710132 (-) //<br>99.59 // q13.3                                                                                                               | down |
| 11730533_a_at | COL13A1 | 1305   | chr10:71561590-71718900 (+) //<br>97.81 // q22.1                                                                                                               | down |
| 11753590_a_at | COMMD9  | 29099  | chr11:36296181-36310962 (-) //<br>99.83 // p13                                                                                                                 | down |
| 11743141_a_at | COX11   | 1353   | chr6:28414702-28417105 (+) //<br>82.07 // p22.1 ///<br>chr17:53029266-53046059 (-) //<br>95.18 // q22                                                          | down |
| 11718556_s_at | CREB3L2 | 64764  | chr7:137559724-137686847 (-) //<br>96.8 // q33                                                                                                                 | down |
| 11723280_at   | CREBZF  | 58487  | chr11:85368395-85376185 (-) //<br>93.51 // q14.1                                                                                                               | down |
| 11733353_at   | CRTAM   | 56253  | chr11:122709207-122743347 (+)<br>// 85.06 // q24.1                                                                                                             | down |
| 11746367_a_at | CSE1L   | 1434   | chr20:47662785-47711357 (+) //<br>89.2 // q13.13                                                                                                               | down |
| 11740002_a_at | CTBP2   | 1488   | chr5:97912042-97914160 (+) //<br>57.96 // q15 ///<br>chr1:68625772-68629239 (-) //<br>92.67 // p31.3 ///<br>chr10:126676417-126849141 (-)<br>// 98.2 // q26.13 | down |
| 11731575_a_at | CTBS    | 1486   | chr1:85018803-85040163 (-) //<br>89.17 // p22.3                                                                                                                | down |
| 11757500_a_at | CTDSPL  | 10217  | chr3:38025592-38025959 (+) //                                                                                                                                  | down |

|               |                     |                    |                                                                                                                                                                |      |
|---------------|---------------------|--------------------|----------------------------------------------------------------------------------------------------------------------------------------------------------------|------|
| 11715441_a_at | CTGF                | 1490               | 91.07 // p22.2<br>chr6:132268798-132272580 (-) //<br>94.17 // q23.2                                                                                            | down |
| 11720494_a_at | CTNNAL1             | 8727               | chr9:111704848-111775874 (-) //<br>98.89 // q31.3                                                                                                              | down |
| 11761290_x_at | CTU2 ///<br>PRKAR2A | 348180 ///<br>5576 | chr16:88772910-88779212 (+) //<br>54.28 // q24.3                                                                                                               | down |
| 11720095_a_at | CUL4B               | 8450               | chrX:119658466-119694936 (-) //<br>98.2 // q24                                                                                                                 | down |
| 11723077_at   | CXorf26             | 51260              | chrX:75392741-75398424 (+) //<br>87.99 // q13.3                                                                                                                | down |
| 11720411_s_at | CYP1B1              | 1545               | chr2:38294650-38303323 (-) //<br>99.15 // p22.2                                                                                                                | down |
| 11734902_a_at | CYP4V2              | 285440             | chr4:187112470-187134612 (+)<br>// 83.43 // q35.2                                                                                                              | down |
| 11726670_a_at | DCLRE1B             | 64858              | chr1:114447767-114456708 (+) //<br>86.37 // p13.2                                                                                                              | down |
| 11729488_x_at | DCLRE1C             | 64421              | chr10:14947927-14996094 (-) //<br>59.05 // p13                                                                                                                 | down |
| 11719471_at   | DCP1A               | 55802              | chr3:53317442-53381654 (-) //<br>94.34 // p21.1                                                                                                                | down |
| 11759818_a_at | DDHD2               | 23259              | chr8:38089470-38120282 (+) //<br>99.34 // p11.23                                                                                                               | down |
| 11730111_a_at | DEPDC1              | 55635              | chr1:68939834-68962799 (-) //<br>78.37 // p31.2                                                                                                                | down |
| 11742239_a_at | DEPDC1B             | 55789              | chr5:59892739-59995993 (-) //<br>94.68 // q12.1                                                                                                                | down |
| 11718998_x_at | DHFR                | 1719               | chr18:23747811-23751321 (-) //<br>38.53 // q11.2 ///<br>chr5:79922190-79950802 (-) //<br>44.53 // q14.1                                                        | down |
| 11745415_a_at | DIAPH1              | 1729               | chr5:140894588-140998496 (-) //<br>98.16 // q31.3                                                                                                              | down |
| 11744730_s_at | DLEU2 ///<br>DLEU2L | 79469 ///<br>8847  | chr13:50617572-50656177 (-) //<br>96.36 // q14.2                                                                                                               | down |
| 11757609_s_at | DLG5                | 9231               | chrX:72075054-72075620 (+) //<br>89.75 // q13.2 ///<br>chr10:79550548-79551114 (-) //<br>100.0 // q22.3 ///<br>chrX:72084903-72085469 (-) //<br>89.75 // q13.2 | down |
| 11720932_s_at | DLST                | 1743               | chr14:75348595-75370443 (+) //<br>98.64 // q24.3 ///<br>chr1:76207710-76210467 (-) //<br>92.51 // p31.1                                                        | down |
| 11740075_at   | DMGDH               | 29958              | chr5:78293386-78365455 (-) //<br>99.97 // q14.1                                                                                                                | down |
| 11755657_s_at | DMXL1               | 1657               | chr5:118572008-118584815 (+) //<br>86.1 // q23.1                                                                                                               | down |
| 11723648_at   | DNAJA2              | 10294              | chr16:46989273-47007699 (-) //<br>97.15 // q11.2                                                                                                               | down |
| 11762410_a_at | DNAJB14             | 79982              | chr15:66062041-66064346 (-) //<br>64.56 // q22.31 ///                                                                                                          | down |



|               |         |        |                                 |      |
|---------------|---------|--------|---------------------------------|------|
|               |         |        | chr4:100819916-100851691 (-) // |      |
|               |         |        | 97.86 // q23                    |      |
| 11743537_a_at | DNAJC18 | 202052 | chr5:138747380-138780171 (-) // | down |
|               |         |        | 86.77 // q31.2                  |      |
| 11720773_x_at | DNAJC19 | 131118 | chr14:45759135-45759676 (+) //  | down |
|               |         |        | 35.2 // q21.2 ///               |      |
|               |         |        | chr3:180701496-180707561 (-) // |      |
|               |         |        | 84.42 // q26.33                 |      |
| 11736405_a_at | DNMT1   | 1786   | chr19:10244022-10305811 (-) //  | down |
|               |         |        | 99.25 // p13.2                  |      |
| 11717200_a_at | DPM2    | 8818   | chr9:130697377-130701204 (-) // | down |
|               |         |        | 77.67 // q34.11                 |      |
| 11716723_at   | DPY19L1 | 23333  | chr7:32852368-32885666 (+) //   | down |
|               |         |        | 69.23 // p14.3 ///              |      |
|               |         |        | chr7:34968492-35077653 (-) //   |      |
|               |         |        | 97.68 // p14.3                  |      |
| 11715751_a_at | DPYSL3  | 1809   | chr5:146770370-146833716 (-) // | down |
|               |         |        | 97.36 // q32                    |      |
| 11721158_a_at | DRAM2   | 128338 | chr1:111659954-111682838 (-) // | down |
|               |         |        | 97.74 // p13.3                  |      |
| 11741980_a_at | DUSP6   | 1848   | chr12:89741838-89746296 (-) //  | down |
|               |         |        | 98.67 // q21.33                 |      |
| 11726597_a_at | DUT     | 1854   | chr15:48623622-48635570 (+) //  | down |
|               |         |        | 90.36 // q21.1                  |      |
| 11747943_a_at | E2F8    | 79733  | chr11:19245879-19263204 (-) //  | down |
|               |         |        | 97.67 // p15.1                  |      |
| 11724301_a_at | EEA1    | 8411   | chr12:93166020-93323107 (-) //  | down |
|               |         |        | 98.46 // q22                    |      |
| 11728379_at   | EFCAB2  | 84288  | chr1:245133040-245251139 (+)    | down |
|               |         |        | // 95.99 // q44                 |      |
| 11725642_at   | EFHD2   | 79180  | chr1:15736391-15756829 (+) //   | down |
|               |         |        | 98.0 // p36.21                  |      |
| 11725102_at   | EGFR    | 1956   | chr7:55086713-55275325 (+) //   | down |
|               |         |        | 94.55 // p11.2                  |      |
| 11733856_s_at | EGLN1   | 54583  | chr1:231499496-231560790 (-) // | down |
|               |         |        | 85.4 // q42.2                   |      |
| 11754334_s_at | EGR1    | 1958   | chr5:137804475-137804992 (+)    | down |
|               |         |        | // 81.29 // q31.2               |      |
| 11722728_a_at | EGR2    | 1959   | chr10:64571756-64578927 (-) //  | down |
|               |         |        | 99.41 // q21.3                  |      |
| 11746045_s_at | ELF2    | 1998   | chr2:186410878-186412545 (-) // | down |
|               |         |        | 50.23 // q32.1 ///              |      |
|               |         |        | chr4:139979431-140005613 (-) // |      |
|               |         |        | 94.61 // q31.1                  |      |
| 11721574_a_at | ELF4    | 2000   | chrX:129198458-129244473 (-)    | down |
|               |         |        | // 94.1 // q26.1                |      |
| 11716654_a_at | EML4    | 27436  | chr2:42396492-42560624 (+) //   | down |
|               |         |        | 98.36 // p21                    |      |
| 11718098_at   | ENDOD1  | 23052  | chr11:94822973-94865809 (+) //  | down |
|               |         |        | 92.24 // q21                    |      |
| 11743265_a_at | ENSA    | 2029   | chr1:150595360-150602098 (-) // | down |
|               |         |        | 90.88 // q21.3                  |      |
| 11715411_a_at | EPAS1   | 2034   | chr2:46524540-46613836 (+) //   | down |

|               |          |        |                                                                                                          |      |
|---------------|----------|--------|----------------------------------------------------------------------------------------------------------|------|
| 11721168_a_at | EPB41L1  | 2036   | 96.03 // p21<br>chr20:34742661-34820719 (+) //<br>93.83 // q11.23                                        | down |
| 11717470_at   | EPT1     | 85465  | chr2:26568953-26618753 (+) //<br>93.8 // p23.3                                                           | down |
| 11721043_at   | ERI1     | 90459  | chr8:8859692-8890848 (+) //<br>83.65 // p23.1                                                            | down |
| 11730914_a_at | ERLIN1   | 10613  | chr10:101909846-101945814 (-)<br>// 97.67 // q24.31                                                      | down |
| 11727968_at   | ESCO2    | 157570 | chr8:27631902-27662802 (+) //<br>84.48 // p21.1                                                          | down |
| 11720352_at   | ETV5     | 2119   | chr3:185764102-185826901 (-) //<br>92.57 // q27.2                                                        | down |
| 11759905_a_at | EXD3     | 54932  | chr9:140260597-140317611 (-) //<br>96.6 // q34.3                                                         | down |
| 11719458_at   | EXOC5    | 10640  | chr14:57668879-57735726 (-) //<br>90.51 // q22.3                                                         | down |
| 11717223_a_at | EXTL3    | 2137   | chr8:28457985-28611204 (+) //<br>96.83 // p21.1                                                          | down |
| 11717657_a_at | EZH2     | 2146   | chr7:148504475-148581411 (-) //<br>95.73 // q36.1                                                        | down |
| 11754939_x_at | FADS2    | 9415   | chr11:61623751-61634819 (+) //<br>90.87 // q12.2                                                         | down |
| 11716002_at   | FAF2     | 23197  | chr5:175875374-175937531 (+)<br>// 94.47 // q35.2                                                        | down |
| 11722128_at   | FAM102B  | 284611 | chr1:109102970-109181949 (+)<br>// 94.44 // p13.3                                                        | down |
| 11752456_a_at | FAM108C1 | 58489  | chr15:80987651-81047678 (+) //<br>88.04 // q25.1                                                         | down |
| 11739933_a_at | FAM111B  | 374393 | chr11:58874657-58894312 (+) //<br>66.83 // q12.1                                                         | down |
| 11750692_s_at | FAM115A  | 9747   | chr7:143295130-143305200 (+)<br>// 92.33 // q35 ///<br>chr7:143550920-143582364 (-) //<br>98.69 // q35   | down |
| 11719737_a_at | FAM134B  | 54463  | chr5:16473146-16617210 (-) //<br>93.2 // p15.1                                                           | down |
| 11755906_a_at | FAM135A  | 57579  | chr6:71238010-71270875 (+) //<br>93.67 // q13                                                            | down |
| 11754677_a_at | FAM169A  | 26049  | chr5:74073425-74191788 (-) //<br>95.41 // q13.3                                                          | down |
| 11719362_at   | FAM178A  | 55719  | chr10:102672325-102724889 (+)<br>// 98.28 // q24.31                                                      | down |
| 11755408_a_at | FAM199X  | 139231 | chrX:103430798-103436125 (+)<br>// 87.14 // q22.2                                                        | down |
| 11752768_s_at | FAM54B   | 56181  | chr1:26155996-26158921 (+) //<br>53.15 // p36.11 ///<br>chr18:31523028-31603560 (-) //<br>46.72 // q12.1 | down |
| 11723747_a_at | FAM64A   | 54478  | chr17:6347758-6354780 (+) //<br>95.58 // p13.2                                                           | down |
| 11740517_a_at | FAM76A   | 199870 | chr1:28052489-28089421 (+) //<br>85.28 // p35.3                                                          | down |

|               |                        |                     |                                                                                                             |      |
|---------------|------------------------|---------------------|-------------------------------------------------------------------------------------------------------------|------|
| 11739255_x_at | FAM84B                 | 157638              | chr8:127564682-127570706 (-) //<br>94.05 // q24.21                                                          | down |
| 11719895_x_at | FAM91A1                | 157769              | chr1:149261011-149266468 (+)<br>// 90.23 // q21.2 ///<br>chr8:124780678-124827688 (+)<br>// 98.14 // q24.13 | down |
| 11719894_s_at | FAM91A1 ///<br>FAM91A2 | 157769 ///<br>57234 | chr1:149261011-149266468 (+)<br>// 90.23 // q21.2 ///<br>chr8:124780678-124827688 (+)<br>// 98.14 // q24.13 | down |
| 11758994_at   | FAR2                   | 55711               | chr12:29376555-29488548 (+) //<br>98.94 // p11.22                                                           | down |
| 11750165_a_at | FARSB                  | 10056               | chr2:223436486-223520808 (-) //<br>98.32 // q36.1                                                           | down |
| 11731124_at   | FBXO36                 | 130888              | chr17:66091209-66092631 (+) //<br>38.81 // q24.2 ///<br>chr2:230787206-230877825 (+)<br>// 90.23 // q36.3   | down |
| 11724963_s_at | FBXO5                  | 26271               | chr6:153291669-153304753 (-) //<br>97.24 // q25.2                                                           | down |
| 11726997_a_at | FIBP                   | 9158                | chr11:65651210-65656010 (-) //<br>96.69 // q13.1                                                            | down |
| 11715425_x_at | FLNA                   | 2316                | chrX:153576899-153599744 (-)<br>// 96.24 // q28                                                             | down |
| 11759342_at   | FMN1                   | 342184              | chr15:33057746-33360085 (-) //<br>96.18 // q13.3                                                            | down |
| 11737831_a_at | FNBP1L                 | 54874               | chr1:93965023-94020216 (+) //<br>98.62 // p22.1                                                             | down |
| 11755772_a_at | FOXO1                  | 2308                | chr13:41129896-41241189 (-) //<br>98.09 // q14.11                                                           | down |
| 11730808_at   | FPGT                   | 8790                | chr1:74663921-74673698 (+) //<br>83.42 // p31.1                                                             | down |
| 11736507_s_at | FRMD6                  | 122786              | chr14:52118574-52197445 (+) //<br>93.34 // q22.1                                                            | down |
| 11725141_a_at | FUBP3                  | 8939                | chr9:133454947-133513739 (+)<br>// 97.62 // q34.11                                                          | down |
| 11757005_a_at | FUCA1                  | 2517                | chr1:24175298-24194780 (-) //<br>100.0 // p36.11                                                            | down |
| 11760826_at   | GALNT3                 | 2591                | chr2:166626165-166650706 (-) //<br>92.07 // q24.3                                                           | down |
| 11722408_at   | GALNT7                 | 51809               | chr4:174089912-174245118 (+)<br>// 97.45 // q34.1                                                           | down |
| 11719353_s_at | GCC2                   | 9648                | chr2:109065576-109125853 (+)<br>// 95.67 // q12.3                                                           | down |
| 11758456_s_at | GFPT1                  | 2673                | chr2:69548817-69549293 (-) //<br>99.79 // p13.3                                                             | down |
| 11728863_at   | GINS1                  | 9837                | chr20:25388320-25427956 (+) //<br>42.53 // p11.21                                                           | down |
| 11732922_at   | GJA3                   | 2700                | chr13:20712396-20735183 (-) //<br>95.98 // q12.11                                                           | down |
| 11722307_at   | GLCE                   | 26035               | chr15:69452972-69564546 (+) //<br>95.59 // q23                                                              | down |
| 11739882_a_at | GLIS3                  | 169792              | chr9:3824127-4300035 (-) //                                                                                 | down |

|               |         |        |                                                                                                    |      |
|---------------|---------|--------|----------------------------------------------------------------------------------------------------|------|
| 11746439_a_at | GLO1    | 2739   | 92.37 // p24.2<br>chr6:38643739-38670917 (-) //<br>90.59 // p21.2                                  | down |
| 11737747_a_at | GMFB    | 2764   | chr14:54941208-54955815 (-) //<br>99.15 // q22.2                                                   | down |
| 11727848_a_at | GNA12   | 2768   | chr7:2767742-2883962 (-) //<br>94.26 // p22.3                                                      | down |
| 11717681_at   | GNA13   | 10672  | chr17:63005406-63052920 (-) //<br>98.58 // q24.1                                                   | down |
| 11721381_at   | GNPTAB  | 79158  | chr12:102139274-102224716 (-)<br>// 88.37 // q23.2                                                 | down |
| 11716752_x_at | GNS     | 2799   | chr12:65107006-65153227 (-) //<br>88.0 // q14.3                                                    | down |
| 11750722_a_at | GPHN    | 10243  | chr14:66975230-67647914 (+) //<br>99.92 // q23.3                                                   | down |
| 11732319_a_at | GPR1    | 2825   | chr2:207039827-207082771 (-) //<br>86.05 // q33.3                                                  | down |
| 11743011_a_at | GPR137B | 7107   | chr1:236305709-236372207 (+)<br>// 93.52 // q42.3                                                  | down |
| 11739977_at   | GPR180  | 160897 | chr13:95253856-95282698 (+) //<br>94.94 // q32.1                                                   | down |
| 11729645_x_at | GPX8    | 493869 | chr5:54455945-54463339 (+) //<br>83.39 // q11.2                                                    | down |
| 11719301_s_at | GRPEL2  | 134266 | chr5:148724375-148734146 (+)<br>// 77.49 // q32                                                    | down |
| 11732171_x_at | GRSF1   | 2926   | chr4:71682122-71705607 (-) //<br>69.33 // q13.3                                                    | down |
| 11723520_a_at | G RTP1  | 79774  | chr13:113978327-114018444 (-)<br>// 96.84 // q34                                                   | down |
| 11719622_at   | GTPBP1  | 9567   | chr22:39101727-39129586 (+) //<br>86.95 // q13.1                                                   | down |
| 11724519_a_at | GUF1    | 60558  | chr4:44680411-44702944 (+) //<br>68.56 // p12                                                      | down |
| 11740663_a_at | GXYLT1  | 283464 | chr12:42475649-42538673 (-) //<br>88.31 // q12                                                     | down |
| 11745819_a_at | H1F0    | 3005   | chr22:38201235-38203439 (+) //<br>94.97 // q13.1                                                   | down |
| 11743694_at   | H2AFV   | 94239  | chr7:44866387-44882954 (-) //<br>65.86 // p13                                                      | down |
| 11733539_a_at | HEATR7A | 727957 | chr8:145202938-145268366 (+)<br>// 80.45 // q24.3                                                  | down |
| 11718309_at   | HEG1    | 57493  | chr3:124684553-124774802 (-) //<br>93.14 // q21.2                                                  | down |
| 11759141_at   | HIP1    | 3092   | chr7:75162618-75368283 (-) //<br>86.45 // q11.23                                                   | down |
| 11719409_a_at | HIPK2   | 28996  | chr7:139246315-139477596 (-) //<br>94.67 // q34                                                    | down |
| 11756138_a_at | HK2     | 3099   | chr2:75062296-75120478 (+) //<br>98.47 // p12 //<br>chrX:79824925-79830043 (-) //<br>91.0 // q21.1 | down |
| 11737371_a_at | HLCS    | 3141   | chr21:38123189-38353125 (-) //<br>96.12 // q22.13                                                  | down |

|               |                       |                  |                                                                                                   |      |
|---------------|-----------------------|------------------|---------------------------------------------------------------------------------------------------|------|
| 11732091_a_at | HMG20A                | 10363            | chr15:77713242-77777943 (+) // 94.6 // q24.3                                                      | down |
| 11740656_a_at | HMGA2                 | 8091             | chr12:66218239-66360070 (+) // 91.11 // q14.3                                                     | down |
| 11754183_s_at | HMGB3                 | 3149             | chrX:150151762-150159246 (+) // 87.43 // q28                                                      | down |
| 11716987_a_at | HMGCS1                | 3157             | chr5:43289207-43313684 (-) // 94.68 // p12                                                        | down |
| 11723197_at   | HNRNPA3               | 220988           | chr2:178077022-178088686 (+) // 93.56 // q31.2 /// chr10:44282572-44285890 (-) // 45.75 // q11.21 | down |
| 11723199_s_at | HNRNPA3 /// HNRNPA3P1 | 10151 /// 220988 | chr2:178077022-178088686 (+) // 93.56 // q31.2 /// chr10:44282572-44285890 (-) // 45.75 // q11.21 | down |
| 11729146_a_at | HNRNPD                | 3184             | chr4:83274213-83295505 (-) // 93.28 // q21.22                                                     | down |
| 11758027_s_at | HOOK1                 | 51361            | chr1:60341429-60341994 (+) // 98.6 // p32.1                                                       | down |
| 11743655_a_at | HPGD                  | 3248             | chr4:175411281-175444049 (-) // 97.21 // q34.1                                                    | down |
| 11725668_at   | HS2ST1                | 9653             | chr1:87380334-87575658 (+) // 90.34 // p22.3                                                      | down |
| 11755876_a_at | IFRD2                 | 7866             | chr3:50325173-50330349 (-) // 97.41 // p21.31                                                     | down |
| 11727320_at   | IGFL2                 | 147920           | chr19:46651038-46664556 (+) // 84.66 // q13.32                                                    | down |
| 11731845_a_at | IGSF3                 | 3321             | chr1:117117030-117210377 (-) // 98.49 // p13.1                                                    | down |
| 11731944_at   | IGSF5                 | 150084           | chr21:41137460-41174023 (+) // 86.29 // q22.2                                                     | down |
| 11751009_s_at | IK                    | 3550             | chr5:140027425-140042063 (+) // 92.11 // q31.3 /// chr2:58687307-58689167 (-) // 85.35 // p16.1   | down |
| 11727905_a_at | IL13RA1               | 3597             | chrX:117861257-117928929 (+) // 91.26 // q24                                                      | down |
| 11740881_x_at | IL15                  | 3600             | chr4:142557748-142654611 (+) // 97.94 // q31.21                                                   | down |
| 11723173_at   | IL17RD                | 54756            | chr3:57124011-57199403 (-) // 84.1 // p14.3                                                       | down |
| 11743858_at   | IL33                  | 90865            | chr9:6215776-6257982 (+) // 99.19 // p24.1                                                        | down |
| 11759037_s_at | IL6ST                 | 3572             | chr5:55232192-55290821 (-) // 96.26 // q11.2                                                      | down |
| 11726159_a_at | IQCG                  | 84223            | chr3:197615945-197686892 (-) // 97.92 // q29                                                      | down |
| 11749201_a_at | IQCJ-SCHIP1           | 100505385        | chr3:158787052-159614563 (+) // 96.58 // q25.32                                                   | down |
|               | /// SCHIP1            | /// 29970        |                                                                                                   |      |
| 11754475_a_at | IQCK                  | 124152           | chr16:19727777-19869067 (+) // 96.4 // p12.3                                                      | down |
| 11721061_a_at | IQGAP2                | 10788            | chr5:75698825-76004056 (+) //                                                                     | down |

|               |           |        |                                                                                                                                                                                                                                                                                                                                                                                             |      |
|---------------|-----------|--------|---------------------------------------------------------------------------------------------------------------------------------------------------------------------------------------------------------------------------------------------------------------------------------------------------------------------------------------------------------------------------------------------|------|
| 11756521_a_at | IREB2     | 3658   | 98.76 // q13.3<br>chr15:78792463-78793794 (+) //<br>55.31 // q25.1                                                                                                                                                                                                                                                                                                                          | down |
| 11716468_s_at | ISCA1     | 81689  | chr2:129274849-129276832 (-) //<br>78.65 // q14.3 ///<br>chr9:88879460-88897676 (-) //<br>88.73 // q21.33                                                                                                                                                                                                                                                                                   | down |
| 11730523_at   | ISM1      | 140862 | chr20:13202446-13281298 (+) //<br>94.49 // p12.1                                                                                                                                                                                                                                                                                                                                            | down |
| 11719100_at   | ITFG3     | 83986  | chr16:284544-316119 (+) //<br>96.22 // p13.3                                                                                                                                                                                                                                                                                                                                                | down |
| 11737219_a_at | ITGB1     | 3688   | chr10:33189246-33247155 (-) //<br>91.17 // p11.22                                                                                                                                                                                                                                                                                                                                           | down |
| 11754810_a_at | ITGB5     | 3693   | chr3:124481794-124489066 (-) //<br>95.68 // q21.2                                                                                                                                                                                                                                                                                                                                           | down |
| 11722503_at   | ITGB8     | 3696   | chr7:20370724-20455382 (+) //<br>90.43 // p21.1                                                                                                                                                                                                                                                                                                                                             | down |
| 11742964_a_at | ITPR3     | 3710   | chr6:33589155-33664351 (+) //<br>99.38 // p21.31                                                                                                                                                                                                                                                                                                                                            | down |
| 11720825_s_at | JAG1      | 182    | chr20:10618333-10654755 (-) //<br>96.82 // p12.2                                                                                                                                                                                                                                                                                                                                            | down |
| 11755223_a_at | JHDM1D    | 80853  | chr7:139784655-139813384 (-) //<br>93.8 // q34                                                                                                                                                                                                                                                                                                                                              | down |
| 11725822_a_at | JPH1      | 56704  | chr8:75146934-75233678 (-) //<br>98.24 // q21.11                                                                                                                                                                                                                                                                                                                                            | down |
| 11758166_s_at | KAL1      | 3730   | chrY:16031240-16031901 (+) //<br>87.46 // q11.221                                                                                                                                                                                                                                                                                                                                           | down |
| 11723325_a_at | KCNQ1     | 3784   | chr11:2466220-2870340 (+) //<br>94.98 // p15.5                                                                                                                                                                                                                                                                                                                                              | down |
| 11758284_s_at | KCTD9     | 54793  | chr11:112055446-112056061 (+)<br>// 93.7 // q23.1 ///<br>chr17:20017849-20018463 (+) //<br>89.29 // p11.2 ///<br>chr9:37479845-37480442 (+) //<br>87.09 // p13.2 ///<br>chrX:104652947-104653561 (+)<br>// 95.59 // q22.3 ///<br>chr5:37504443-37505056 (-) //<br>91.5 // p13.2 ///<br>chr8:25285538-25286148 (-) //<br>96.06 // p21.2 ///<br>chr8:31075696-31076304 (-) //<br>90.71 // p12 | down |
| 11730180_s_at | KDSR      | 2531   | chr18:60994807-61034516 (-) //<br>81.73 // q21.33                                                                                                                                                                                                                                                                                                                                           | down |
| 11721807_a_at | KIAA0090  | 23065  | chr1:19541883-19578291 (-) //<br>85.03 // p36.13                                                                                                                                                                                                                                                                                                                                            | down |
| 11735833_a_at | KIAA1199  | 57214  | chr15:81071683-81243999 (+) //<br>97.76 // q25.1                                                                                                                                                                                                                                                                                                                                            | down |
| 11737795_a_at | KIAA1524  | 57650  | chr3:108268719-108308491 (-) //<br>98.9 // q13.13                                                                                                                                                                                                                                                                                                                                           | down |
| 11746232_a_at | KIDINS220 | 57498  | chr2:8869058-8977726 (-) //<br>98.16 // p25.1                                                                                                                                                                                                                                                                                                                                               | down |

|               |              |           |                                                    |      |
|---------------|--------------|-----------|----------------------------------------------------|------|
| 11727489_a_at | KIF11        | 3832      | chr10:94352824-94415152 (+) //<br>91.06 // q23.33  | down |
| 11731887_at   | KIF14        | 9928      | chr1:200520627-200589862 (-) //<br>94.85 // q32.1  | down |
| 11723010_a_at | KIF20A       | 10112     | chr5:137514404-137523851 (+)<br>// 99.92 // q31.2  | down |
| 11721932_a_at | KIF23        | 9493      | chr15:69706687-69740766 (+) //<br>98.27 // q23     | down |
| 11739068_a_at | KIFAP3       | 22920     | chr1:169890471-170043897 (-) //<br>98.98 // q24.2  | down |
| 11728954_a_at | KITLG        | 4254      | chr12:88886569-88974238 (-) //<br>94.59 // q21.32  | down |
| 11733068_s_at | KLF10        | 7071      | chr8:103661011-103668130 (-) //<br>95.94 // q22.3  | down |
| 11727145_s_at | KLF11        | 8462      | chr2:10183681-10194963 (+) //<br>97.38 // p25.1    | down |
| 11717326_at   | KLF9         | 687       | chr9:72999512-73029573 (-) //<br>95.75 // q21.12   | down |
| 11760228_s_at | KLHL23       | 151230    | chr2:170590355-170608394 (+)<br>// 69.17 // q31.1  | down |
| 11718199_at   | KPNA3        | 3839      | chr13:50273442-50367214 (-) //<br>96.14 // q14.2   | down |
| 11723269_at   | KPNA6        | 23633     | chr1:32573626-32642164 (+) //<br>90.45 // p35.1    | down |
| 11716051_at   | LAMC1        | 3915      | chr1:182992594-183114726 (+)<br>// 97.74 // q25.3  | down |
| 11719614_a_at | LARP4        | 113251    | chr12:50794639-50873787 (+) //<br>97.82 // q13.12  | down |
| 11726871_s_at | LEPR         | 3953      | chr1:65886317-66101111 (+) //<br>99.36 // p31.3    | down |
| 11759120_a_at | LGR5         | 8549      | chr12:71833571-71980086 (+) //<br>99.44 // q21.1   | down |
| 11736709_a_at | LIMCH1       | 22998     | chr4:41614918-41702060 (+) //<br>97.71 // p13      | down |
| 11740773_s_at | LIN54        | 132660    | chr4:83845755-83931982 (-) //<br>85.32 // q21.22   | down |
| 11724652_a_at | LMBR1        | 64327     | chr7:156473574-156685902 (-) //<br>98.39 // q36.3  | down |
| 11744604_at   | LOC100288413 | 100288413 | chr4:53609691-53617566 (-) //<br>18.48 // q12      | down |
| 11763303_at   | LOC100506748 | 100506748 | chr2:114464355-114468151 (-) //<br>62.62 // q14.1  | down |
| 11759610_at   | LOC404266    | 404266    | chr17:46667822-46683762 (+) //<br>81.93 // q21.32  | down |
| 11760121_at   | LONP2        | 83752     | chr16:48278243-48396896 (+) //<br>73.82 // q12.1   | down |
| 11725417_a_at | LPCAT2       | 54947     | chr16:55542674-55620582 (+) //<br>92.02 // q12.2   | down |
| 11723468_at   | LPGAT1       | 9926      | chr1:211916799-212004114 (-) //<br>88.46 // q32.3  | down |
| 11742722_at   | LRRC58       | 116064    | chr3:120043318-120068214 (-) //<br>81.65 // q13.33 | down |
| 11752870_a_at | LRRC1        | 85444     | chr8:86019322-86047151 (+) //                      | down |

|               |           |        |                                                                                                        |      |
|---------------|-----------|--------|--------------------------------------------------------------------------------------------------------|------|
| 11736533_s_at | LRRFIP1   | 9208   | 95.74 // q21.2<br>chr2:238536223-238690286 (+)<br>// 94.48 // q37.3                                    | down |
| 11736150_at   | LYRM2     | 57226  | chr6:90341944-90348475 (-) //<br>64.9 // q15                                                           | down |
| 11717241_a_at | MAEA      | 10296  | chr4:1283640-1333925 (+) //<br>98.22 // p16.3                                                          | down |
| 11756693_a_at | MAGED1    | 9500   | chrX:51636734-51641253 (+) //<br>95.0 // p11.22                                                        | down |
| 11757043_a_at | MAGED2    | 10916  | chrX:54834795-54841208 (+) //<br>95.17 // p11.21                                                       | down |
| 11723447_at   | MALL      | 7851   | chr2:111037181-111045079 (+) //<br>58.09 // q13 ///<br>chr2:110841450-110874143 (-) //<br>83.21 // q13 | down |
| 11733114_a_at | MANBAL    | 63905  | chr20:35929608-35945661 (+) //<br>83.26 // q11.23                                                      | down |
| 11719499_at   | MAOB      | 4129   | chrX:43625859-43741721 (-) //<br>89.24 // p11.3                                                        | down |
| 11724902_a_at | MAP3K14   | 9020   | chr17:43340490-43394511 (-) //<br>97.72 // q21.31                                                      | down |
| 11736006_at   | MAPK1IP1L | 93487  | chr14:55518355-55536912 (+) //<br>89.37 // q22.3                                                       | down |
| 11744024_a_at | MARS      | 4141   | chr12:57881689-57910432 (+) //<br>90.27 // q13.3                                                       | down |
| 11717009_s_at | MCFD2     | 90411  | chr2:47129012-47136317 (-) //<br>42.22 // p21                                                          | down |
| 11743693_a_at | MCM4      | 4173   | chr8:48872762-48891078 (+) //<br>82.81 // q11.21                                                       | down |
| 11722383_a_at | MDM1      | 56890  | chr12:68688345-68726161 (-) //<br>97.92 // q15                                                         | down |
| 11756418_a_at | MEAF6     | 64769  | chr1:37958778-37980417 (-) //<br>90.0 // p34.3                                                         | down |
| 11759175_at   | MED28     | 80306  | chr4:17616279-17627249 (+) //<br>81.76 // p15.32                                                       | down |
| 11746193_a_at | METTL3    | 56339  | chr14:21966305-21979482 (-) //<br>99.51 // q11.2                                                       | down |
| 11741010_a_at | MFN2      | 9927   | chr1:12040237-12073571 (+) //<br>99.78 // p36.22                                                       | down |
| 11734534_s_at | MFSD6     | 54842  | chr2:191273080-191367040 (+)<br>// 96.61 // q32.2                                                      | down |
| 11750984_a_at | MGAT2     | 4247   | chr14:50087532-50089583 (+) //<br>100.0 // q21.3                                                       | down |
| 11721144_a_at | MKI67     | 4288   | chr10:129894922-129924655 (-)<br>// 98.51 // q26.2                                                     | down |
| 11729551_s_at | MKLN1     | 4289   | chr7:130794854-131181398 (+)<br>// 96.35 // q32.3                                                      | down |
| 11754396_a_at | MLLT3     | 4300   | chr9:20344803-20414267 (-) //<br>97.45 // p21.3                                                        | down |
| 11733445_at   | MMS22L    | 253714 | chr6:97590036-97731052 (-) //<br>90.35 // q16.1                                                        | down |
| 11725167_at   | MOBKL2B   | 79817  | chr9:27325208-27529851 (-) //<br>85.65 // p21.2                                                        | down |



|               |                      |                    |                                                   |      |
|---------------|----------------------|--------------------|---------------------------------------------------|------|
| 11717643_a_at | MRPL24               | 79590              | chr1:156707094-156710906 (-) //<br>67.38 // q23.1 | down |
| 11743334_a_at | MRPL35               | 51318              | chr2:86426477-86440917 (+) //<br>78.57 // p11.2   | down |
| 11715790_a_at | MRPL37               | 51253              | chr1:54665820-54684056 (+) //<br>96.21 // p32.3   | down |
| 11725683_at   | MRS2                 | 57380              | chr6:24403135-24426418 (+) //<br>97.61 // p22.3   | down |
| 11716413_x_at | MT1E                 | 4493               | chr16:56659386-56661020 (+) //<br>78.1 // q12.2   | down |
| 11717710_a_at | MTFP1                | 51537              | chr22:30821451-30825040 (+) //<br>79.23 // q12.2  | down |
| 11717711_s_at | MTFP1 ///<br>SEC14L2 | 23541 ///<br>51537 | chr22:30821451-30825040 (+) //<br>79.23 // q12.2  | down |
| 11728984_a_at | MTHFD1L              | 25902              | chr6:151186690-151423021 (+)<br>// 96.85 // q25.1 | down |
| 11762057_at   | MTHFD2L              | 441024             | chr4:74979890-75107914 (+) //<br>57.93 // q13.3   | down |
| 11727722_a_at | MYB                  | 4602               | chr6:135502449-135540310 (+)<br>// 93.45 // q23.3 | down |
| 11728523_a_at | MYCL1                | 4610               | chr1:40361099-40367687 (-) //<br>97.97 // p34.2   | down |
| 11754984_s_at | MYH10                | 4628               | chr17:8377531-8534068 (-) //<br>99.06 // p13.1    | down |
| 11742414_x_at | MYO10                | 4651               | chr5:16662016-16936385 (-) //<br>85.04 // p15.1   | down |
| 11716452_a_at | MYO1C                | 4641               | chr17:1367394-1396106 (-) //<br>88.85 // p13.3    | down |
| 11726456_at   | MYO5B                | 4645               | chr18:47349100-47721452 (-) //<br>99.25 // q21.1  | down |
| 11715908_at   | MYO6                 | 4646               | chr6:76458892-76629254 (+) //<br>91.39 // q14.1   | down |
| 11739508_a_at | NAA30                | 122830             | chr14:57857270-57879699 (+) //<br>97.26 // q22.3  | down |
| 11739475_s_at | NAB1                 | 4664               | chr2:191513847-191557492 (+)<br>// 98.45 // q32.2 | down |
| 11717852_at   | NAGLU                | 4669               | chr17:40687945-40696671 (+) //<br>88.81 // q21.2  | down |
| 11762777_a_at | NAP1L1               | 4673               | chr12:76443055-76478392 (-) //<br>99.79 // q21.2  | down |
| 11715746_a_at | NBL1                 | 4681               | chr1:19969722-19984945 (+) //<br>86.69 // p36.13  | down |
| 11722825_at   | NCAPG                | 64151              | chr4:17812435-17846629 (+) //<br>98.45 // p15.31  | down |
| 11757197_s_at | NCRNA00201           | 284702             | chr1:245003940-245010243 (-) //<br>85.17 // q44   | down |
| 11756077_a_at | NDE1                 | 54820              | chr16:15815493-15818991 (+) //<br>64.18 // p13.11 | down |
| 11730881_a_at | NEBL                 | 10529              | chr10:21068904-21186531 (-) //<br>98.58 // p12.31 | down |
| 11740287_a_at | NEDD1                | 121441             | chr12:97301000-97347461 (+) //<br>97.91 // q23.1  | down |
| 11722251_a_at | NEK2                 | 4751               | chr1:211836113-211849184 (-) //                   | down |

|               |          |        |                                                                                                                                                                   |      |
|---------------|----------|--------|-------------------------------------------------------------------------------------------------------------------------------------------------------------------|------|
| 11718464_s_at | NEURL1B  | 54492  | 96.39 // q32.3<br>chr5:172068275-172118543 (+)<br>// 90.9 // q35.1                                                                                                | down |
| 11722661_at   | NFE2L3   | 9603   | chr17:45500853-45504058 (+) //<br>72.74 // q21.32 ///<br>chr18:57636678-57639976 (+) //<br>82.91 // q21.32 ///<br>chr7:26191857-26226745 (+) //<br>95.42 // p15.2 | down |
| 11758230_s_at | NFIA     | 4774   | chr1:61923229-61923901 (+) //<br>87.06 // p31.3                                                                                                                   | down |
| 11755756_a_at | NHSL1    | 57224  | chr6:138743182-138768326 (-) //<br>97.64 // q23.3                                                                                                                 | down |
| 11743377_a_at | NIN      | 51199  | chr14:51186483-51297858 (-) //<br>91.53 // q22.1                                                                                                                  | down |
| 11759191_at   | NIPAL2   | 79815  | chr8:99202053-99306621 (-) //<br>84.71 // q22.2                                                                                                                   | down |
| 11725627_at   | NIPAL3   | 57185  | chr1:24742239-24799473 (+) //<br>86.99 // p36.11                                                                                                                  | down |
| 11715733_a_at | NIPSNAP1 | 8508   | chr22:29950796-29977328 (-) //<br>89.36 // q12.2                                                                                                                  | down |
| 11736283_s_at | NKX3-1   | 4824   | chr8:23536205-23540450 (-) //<br>97.29 // p21.2                                                                                                                   | down |
| 11718435_a_at | NPNT     | 255743 | chr4:106816604-106892816 (+)<br>// 94.19 // q24                                                                                                                   | down |
| 11717568_s_at | NQO1     | 1728   | chr16:69743303-69760557 (-) //<br>84.7 // q22.1                                                                                                                   | down |
| 11757751_s_at | NRP1     | 8829   | chr10:33466494-33467764 (-) //<br>95.38 // p11.22                                                                                                                 | down |
| 11755207_a_at | NT5E     | 4907   | chr6:86159826-86205498 (+) //<br>92.66 // q14.3                                                                                                                   | down |
| 11728647_at   | NUCKS1   | 64710  | chr1:205681946-205719257 (-) //<br>94.14 // q32.1                                                                                                                 | down |
| 11732160_a_at | NUDCD1   | 84955  | chr8:110253147-110346614 (-) //<br>90.31 // q23.1                                                                                                                 | down |
| 11722442_a_at | NUF2     | 83540  | chr1:163291689-163325554 (+)<br>// 97.51 // q23.3                                                                                                                 | down |
| 11744020_at   | NUP210   | 23225  | chr3:13357734-13461809 (-) //<br>97.59 // p25.1                                                                                                                   | down |
| 11731490_a_at | NUP43    | 348995 | chr6:150045456-150067678 (-) //<br>68.99 // q25.1                                                                                                                 | down |
| 11722554_at   | NUP88    | 4927   | chr17:5287498-5323355 (-) //<br>97.75 // p13.2                                                                                                                    | down |
| 11734501_a_at | NUP98    | 4928   | chr11:3696240-3818892 (-) //<br>97.51 // p15.4                                                                                                                    | down |
| 11740934_a_at | NUSAP1   | 51203  | chr15:41624925-41673247 (+) //<br>97.07 // q15.1                                                                                                                  | down |
| 11727986_at   | ODZ3     | 55714  | chr4:183245096-183724177 (+)<br>// 97.98 // q35.1                                                                                                                 | down |
| 11736300_a_at | ORMDL1   | 94101  | chr2:190634993-190649075 (-) //<br>98.13 // q32.2                                                                                                                 | down |
| 11719881_s_at | OSTM1    | 28962  | chr6:108362614-108395966 (-) //<br>86.68 // q21                                                                                                                   | down |

|               |             |           |                                                     |      |
|---------------|-------------|-----------|-----------------------------------------------------|------|
| 11741895_a_at | OTUD4       | 54726     | chr4:146080288-146100832 (-) //<br>100.0 // q31.21  | down |
| 11745194_a_at | OXCT1       | 5019      | chr5:41730168-41870561 (-) //<br>98.96 // p13.1     | down |
| 11716173_a_at | P4HB        | 5034      | chr17:79801133-79818544 (-) //<br>86.61 // q25.3    | down |
| 11722146_s_at | PAIP2B      | 400961    | chr2:71409867-71454237 (-) //<br>87.87 // p13.3     | down |
| 11727545_at   | PANK3       | 79646     | chr5:167982377-168006610 (-) //<br>88.16 // q34     | down |
| 11757794_s_at | PAPD5       | 64282     | chr16:50265271-50265735 (+) //<br>95.26 // q12.1    | down |
| 11721318_at   | PARM1       | 25849     | chr4:75858287-75975323 (+) //<br>91.65 // q13.3     | down |
| 11726247_s_at | PARP1       | 142       | chr1:226548392-226595827 (-) //<br>97.66 // q42.12  | down |
| 11723950_a_at | PBK         | 55872     | chr8:27667137-27695612 (-) //<br>97.47 // p21.1     | down |
| 11742072_a_at | PBX3        | 5090      | chr9:128510477-128729653 (+)<br>// 98.62 // q33.3   | down |
| 11727198_a_at | PCDHA1 ///  | 56134 /// | chr5:140247649-140391929 (+)                        | down |
|               | PCDHA10 /// | 56135 /// | // 93.16 // q31.3                                   |      |
|               | PCDHA11 /// | 56136 /// |                                                     |      |
|               | PCDHA12 /// | 56137 /// |                                                     |      |
|               | PCDHA13 /// | 56138 /// |                                                     |      |
|               | PCDHA2 ///  | 56139 /// |                                                     |      |
|               | PCDHA3 ///  | 56140 /// |                                                     |      |
|               | PCDHA4 ///  | 56141 /// |                                                     |      |
|               | PCDHA5 ///  | 56142 /// |                                                     |      |
|               | PCDHA6 ///  | 56143 /// |                                                     |      |
|               | PCDHA7 ///  | 56144 /// |                                                     |      |
|               | PCDHA8 ///  | 56145 /// |                                                     |      |
|               | PCDHA9 ///  | 56146 /// |                                                     |      |
|               | PCDHAC1 /// | 56147 /// |                                                     |      |
|               | PCDHAC2     | 9752      |                                                     |      |
| 11724553_at   | PCGF5       | 84333     | chr10:92979933-93044086 (+) //<br>92.97 // q23.32   | down |
| 11754738_a_at | PDE2A       | 5138      | chr11:72287185-72369165 (-) //<br>94.61 // q13.4    | down |
| 11730906_at   | PDS5B       | 23047     | chr13:33160563-33352157 (+) //<br>99.27 // q13.1    | down |
| 11756577_a_at | PEA15       | 8682      | chr1:160175169-160184687 (+)<br>// 93.39 // q23.2   | down |
| 11720526_s_at | PEBP1       | 5037      | chr12:118573662-118583389 (+)<br>// 93.96 // q24.23 | down |
| 11758315_s_at | PER2        | 8864      | chr2:239152686-239153368 (-) //<br>99.85 // q37.3   | down |
| 11733124_a_at | PEX19       | 5824      | chr1:160246598-160254939 (-) //<br>89.07 // q23.2   | down |
| 11756171_a_at | PFKFB2      | 5208      | chr1:207226384-207250135 (+)<br>// 75.79 // q32.2   | down |
| 11739711_a_at | PHACTR2     | 9749      | chr6:143999101-144152321 (+)<br>// 92.55 // q24.2   | down |

|               |         |       |                                                                                                           |      |
|---------------|---------|-------|-----------------------------------------------------------------------------------------------------------|------|
| 11753313_a_at | PHB2    | 11331 | chr12:7074754-7079831 (-) //<br>99.41 // p13.31                                                           | down |
| 11721972_at   | PHF16   | 9767  | chrX:46771867-46920641 (+) //<br>95.25 // p11.23                                                          | down |
| 11728203_a_at | PHGDH   | 26227 | chr1:120254418-120286838 (+)<br>// 95.23 // p12                                                           | down |
| 11727180_a_at | PHTF1   | 10745 | chr1:114239828-114302165 (-) //<br>98.5 // p13.2                                                          | down |
| 11754722_s_at | PI4K2B  | 55300 | chr4:25235654-25280713 (+) //<br>99.91 // p15.2                                                           | down |
| 11725842_a_at | PIF1    | 80119 | chr15:65107835-65117867 (-) //<br>97.57 // q22.31                                                         | down |
| 11737862_at   | PIGF    | 5281  | chr2:46808423-46844225 (-) //<br>85.47 // p21                                                             | down |
| 11721856_a_at | PIGK    | 10026 | chr1:77554665-77685132 (-) //<br>85.66 // p31.1                                                           | down |
| 11724972_a_at | PIGN    | 23556 | chr18:59711049-59854289 (-) //<br>94.21 // q21.33                                                         | down |
| 11758657_s_at | PKIG    | 11142 | chr20:43247223-43247675 (+) //<br>98.38 // q13.12                                                         | down |
| 11726131_a_at | PKP2    | 5318  | chr12:6586807-6591357 (+) //<br>90.72 // p13.31 ///<br>chr12:32943678-33049780 (-) //<br>97.58 // p11.21  | down |
| 11730106_a_at | PLCB1   | 23236 | chr20:8112911-8865551 (+) //<br>98.9 // p12.3                                                             | down |
| 11727407_at   | PLEKHA3 | 65977 | chr2:179344911-179370090 (+)<br>// 96.88 // q31.2 ///<br>chr19:42026593-42028737 (-) //<br>63.49 // q13.2 | down |
| 11759078_at   | PLRG1   | 5356  | chr4:155456156-155471587 (-) //<br>77.81 // q31.3                                                         | down |
| 11726470_s_at | PLS1    | 5357  | chr3:142342227-142432506 (+)<br>// 97.43 // q23                                                           | down |
| 11757503_s_at | PNN     | 5411  | chr14:39651574-39652143 (+) //<br>92.21 // q21.1                                                          | down |
| 11716959_s_at | POMGNT1 | 55624 | chr1:46654352-46664111 (-) //<br>96.51 // p34.1                                                           | down |
| 11724413_s_at | PPARA   | 5465  | chr22:46546730-46641621 (+) //<br>92.86 // q13.31                                                         | down |
| 11753001_a_at | PPARG   | 5468  | chr3:12421204-12458653 (+) //<br>95.66 // p25.2                                                           | down |
| 11725616_at   | PPP1CB  | 5500  | chr2:28974625-29025806 (+) //<br>94.87 // p23.2                                                           | down |
| 11716069_at   | PPPDE1  | 51029 | chr1:244816055-244872335 (+)<br>// 97.71 // q44                                                           | down |
| 11725778_a_at | PRDM2   | 7799  | chr1:14031108-14151574 (+) //<br>96.38 // p36.21                                                          | down |
| 11716703_a_at | PRKACB  | 5567  | chr1:84543715-84704692 (+) //<br>93.04 // p31.1                                                           | down |
| 11760103_at   | PRKAR2A | 5576  | chr3:48784018-48885261 (-) //<br>79.43 // p21.31                                                          | down |
| 11754557_s_at | PRKCA   | 5578  | chr17:64804440-64806861 (+) //                                                                            | down |

|               |         |        |                                                                                                                                                                                                                                                                                                |      |
|---------------|---------|--------|------------------------------------------------------------------------------------------------------------------------------------------------------------------------------------------------------------------------------------------------------------------------------------------------|------|
| 11735731_a_at | PRKRIR  | 5612   | 85.99 // q24.2<br>chr10:54170804-54174413 (+) //<br>90.94 // q21.1 ///<br>chr3:86061647-86065196 (+) //<br>90.77 // p12.1 ///<br>chr11:76060999-76091986 (-) //<br>95.56 // q13.5 ///<br>chr12:43962344-43965950 (-) //<br>92.1 // q12 ///<br>chr8:79671455-79674772 (-) //<br>95.03 // q21.12 | down |
| 11764058_at   | PRNP    | 5621   | chr20:4681519-4682236 (-) //<br>93.51 // p13                                                                                                                                                                                                                                                   | down |
| 11737783_a_at | PROSC   | 11212  | chr8:37620100-37637282 (+) //<br>88.64 // p11.23                                                                                                                                                                                                                                               | down |
| 11743070_at   | PRPF38A | 84950  | chr1:52870218-52884784 (+) //<br>98.6 // p32.3                                                                                                                                                                                                                                                 | down |
| 11719381_a_at | PSENN   | 55851  | chr19:36235992-36238417 (+) //<br>92.5 // q13.12                                                                                                                                                                                                                                               | down |
| 11742933_a_at | PSIP1   | 11168  | chr9:15464063-15511017 (-) //<br>98.69 // p22.3                                                                                                                                                                                                                                                | down |
| 11732550_at   | PTGER2  | 5732   | chr14:52781015-52795976 (+) //<br>98.65 // q22.1                                                                                                                                                                                                                                               | down |
| 11717341_at   | PTGFRN  | 5738   | chr1:117452572-117532975 (+) //<br>96.47 // p13.1                                                                                                                                                                                                                                              | down |
| 11759479_s_at | PTP4A2  | 8073   | chr1:32372023-32403955 (-) //<br>88.6 // p35.2                                                                                                                                                                                                                                                 | down |
| 11729206_at   | PTPN11  | 5781   | chr12:112856535-112947717 (+)<br>// 91.45 // q24.13                                                                                                                                                                                                                                            | down |
| 11749088_s_at | PTPRK   | 5796   | chr6:128290121-128841621 (-) //<br>99.53 // q22.33                                                                                                                                                                                                                                             | down |
| 11758970_a_at | PVRL3   | 25945  | chr3:110790600-110854801 (+) //<br>91.74 // q13.13                                                                                                                                                                                                                                             | down |
| 11739313_a_at | PWP1    | 11137  | chr12:108079559-108106257 (+)<br>// 97.13 // q23.3                                                                                                                                                                                                                                             | down |
| 11723801_s_at | PYROXD1 | 79912  | chr12:21590537-21624342 (+) //<br>89.5 // p12.1 ///<br>chr11:106694628-106698744 (-)<br>// 84.0 // q22.3                                                                                                                                                                                       | down |
| 11718217_at   | RAB22A  | 57403  | chr20:56884751-56942563 (+) //<br>88.45 // q13.32                                                                                                                                                                                                                                              | down |
| 11758481_s_at | RAB3IP  | 117177 | chr12:70213866-70214492 (+) //<br>30.04 // q15                                                                                                                                                                                                                                                 | down |
| 11720798_at   | RAB8B   | 51762  | chr15:63481667-63559975 (+) //<br>98.72 // q22.2                                                                                                                                                                                                                                               | down |
| 11720808_a_at | RABEPK  | 10244  | chr9:127962861-127996437 (+)<br>// 92.46 // q33.3                                                                                                                                                                                                                                              | down |
| 11749520_a_at | RABGAP1 | 23637  | chr9:125795787-125865845 (+)<br>// 95.86 // q33.2                                                                                                                                                                                                                                              | down |
| 11715576_at   | RAC1    | 5879   | chr7:6414165-6443601 (+) //<br>89.77 // p22.1                                                                                                                                                                                                                                                  | down |
| 11722870_at   | RAD1    | 5810   | chr5:34905367-34916883 (-) //<br>74.79 // p13.2                                                                                                                                                                                                                                                | down |

|               |          |        |                                                                                                                                                               |      |
|---------------|----------|--------|---------------------------------------------------------------------------------------------------------------------------------------------------------------|------|
| 11728447_at   | RAD54B   | 25788  | chr8:95384188-95487343 (-) //<br>99.42 // q22.1                                                                                                               | down |
| 11760837_at   | RAET1E   | 135250 | chr6:150204321-150219238 (-) //<br>58.94 // q25.1                                                                                                             | down |
| 11717756_s_at | RALA     | 5898   | chr7:39663081-39747816 (+) //<br>98.03 // p14.1                                                                                                               | down |
| 11748706_a_at | RALY     | 22913  | chr20:32581722-32661841 (+) //<br>78.01 // q11.22                                                                                                             | down |
| 11758403_s_at | RAPH1    | 65059  | chr2:204300665-204301205 (-) //<br>99.63 // q33.2                                                                                                             | down |
| 11760503_a_at | RASSF8   | 11228  | chr12:26208168-26225582 (+) //<br>97.94 // p12.1                                                                                                              | down |
| 11737075_a_at | RBFOX2   | 23543  | chr22:36134783-36424585 (-) //<br>96.69 // q12.3                                                                                                              | down |
| 11717422_s_at | RBM8A    | 9939   | chr1:145507556-145512878 (+)<br>// 83.85 // q21.1 ///<br>chr14:60864424-60867232 (+) //<br>57.99 // q23.1                                                     | down |
| 11729738_x_at | RCCD1    | 91433  | chr15:91498130-91506353 (+) //<br>51.67 // q26.1                                                                                                              | down |
| 11729123_a_at | RCN2     | 5955   | chr15:77223959-77242601 (+) //<br>98.11 // q24.3                                                                                                              | down |
| 11748967_a_at | RDX      | 5962   | chr11:110102281-110167339 (-)<br>// 94.31 // q22.3 ///<br>chr11:4231267-4233528 (-) //<br>88.67 // p15.4                                                      | down |
| 11739729_a_at | RECQL    | 5965   | chr12:21621844-21654603 (-) //<br>87.18 // p12.1                                                                                                              | down |
| 11748631_a_at | REEP5    | 7905   | chr5:112213497-112257936 (-) //<br>93.86 // q22.2                                                                                                             | down |
| 11726839_s_at | RELL1    | 768211 | chr4:37612255-37687999 (-) //<br>80.18 // p14                                                                                                                 | down |
| 11718171_a_at | RFWD2    | 64326  | chr1:175913966-176176629 (-) //<br>97.53 // q25.1                                                                                                             | down |
| 11731613_a_at | RHEBL1   | 121268 | chr12:49458327-49463792 (-) //<br>89.06 // q13.12                                                                                                             | down |
| 11716455_at   | RHOBTB3  | 22836  | chr5:95066778-95132071 (+) //<br>89.15 // q15                                                                                                                 | down |
| 11717417_s_at | RHOU     | 58480  | chr1:228870823-228882416 (+)<br>// 91.44 // q42.13                                                                                                            | down |
| 11724691_at   | RIBC2    | 26150  | chr22:45809570-45828298 (+) //<br>96.75 // q13.31                                                                                                             | down |
| 11723452_s_at | RIOK2    | 55781  | chr5:96496571-96519005 (-) //<br>91.59 // q15                                                                                                                 | down |
| 11725340_a_at | RNASEH1  | 246243 | chr17:16586714-16587543 (+) //<br>39.07 // p11.2 ///<br>chr17:20805289-20806080 (-) //<br>39.38 // p11.2 ///<br>chr2:3592676-3606206 (-) //<br>91.47 // p25.3 | down |
| 11732832_a_at | RNASEH2B | 79621  | chr13:51483891-51544596 (+) //<br>98.7 // q14.3                                                                                                               | down |
| 11747975_x_at | RNF145   | 153830 | chr15:23499339-23501361 (-) //                                                                                                                                | down |

|               |         |        |                                 |      |
|---------------|---------|--------|---------------------------------|------|
|               |         |        | 69.74 // q11.2 ///              |      |
|               |         |        | chr15:20831935-20833957 (-) //  |      |
|               |         |        | 69.67 // q11.2 ///              |      |
|               |         |        | chr5:158585298-158635264 (-) // |      |
|               |         |        | 97.95 // q33.3                  |      |
| 11725676_a_at | RORA    | 6095   | chr15:60780482-60919729 (-) //  | down |
|               |         |        | 95.82 // q22.2                  |      |
| 200022_PM_at  | RPL18   | 6141   | chr16:76268919-76269536 (-) //  | down |
|               |         |        | 90.16 // q23.1 ///              |      |
|               |         |        | chr19:49118588-49121135 (-) //  |      |
|               |         |        | 96.03 // q13.33                 |      |
| 11757422_x_at | RPL23   | 9349   | chr17:37006351-37009360 (-) //  | down |
|               |         |        | 70.75 // q12                    |      |
| 11736721_x_at | RPL32   | 6161   | chr3:12876444-12883081 (-) //   | down |
|               |         |        | 82.08 // p25.2                  |      |
| 11759114_at   | RPL37   | 6167   | chr5:40825363-40835314 (-) //   | down |
|               |         |        | 58.73 // p13.1                  |      |
| 11736192_at   | RRM2B   | 50484  | chr8:103216727-103251346 (-) // | down |
|               |         |        | 84.81 // q22.3                  |      |
| 11759693_at   | RTKN2   | 219790 | chr10:63997910-64028622 (-) //  | down |
|               |         |        | 93.69 // q21.2                  |      |
| 11756882_a_at | RTTN    | 25914  | chr18:67671044-67863889 (-) //  | down |
|               |         |        | 97.69 // q22.2                  |      |
| 11728761_a_at | RUNX1   | 861    | chr21:36160098-36261004 (-) //  | down |
|               |         |        | 94.53 // q22.12                 |      |
| 11717539_at   | RYBP    | 23429  | chr3:72423754-72496264 (-) //   | down |
|               |         |        | 91.39 // p13                    |      |
| 11724139_s_at | SACS    | 26278  | chr13:23902965-24007867 (-) //  | down |
|               |         |        | 99.21 // q12.12                 |      |
| 11727336_at   | SAMD12  | 401474 | chr8:119201698-119634184 (-) // | down |
|               |         |        | 94.24 // q24.12                 |      |
| 11720376_a_at | SAP30L  | 79685  | chr5:153825516-153840613 (+)    | down |
|               |         |        | // 90.35 // q33.2               |      |
| 11728906_s_at | SATB2   | 23314  | chr2:200134225-200329831 (-) // | down |
|               |         |        | 96.67 // q33.1                  |      |
| 11739478_s_at | SBF2    | 81846  | chr11:9800213-10315754 (-) //   | down |
|               |         |        | 98.64 // p15.4                  |      |
| 11715897_at   | SCARB2  | 950    | chr4:77079889-77135039 (-) //   | down |
|               |         |        | 89.53 // q21.1                  |      |
| 11756174_s_at | SCD     | 6319   | chr10:102123890-102124583 (+)   | down |
|               |         |        | // 69.04 // q24.31 ///          |      |
|               |         |        | chr17:20692238-20692927 (+) //  |      |
|               |         |        | 66.12 // p11.2                  |      |
| 11731606_at   | SCIN    | 85477  | chr7:12610089-12693227 (+) //   | down |
|               |         |        | 84.64 // p21.3                  |      |
| 11734521_x_at | SCLT1   | 132320 | chr4:129805151-130014764 (-) // | down |
|               |         |        | 99.87 // q28.2                  |      |
| 11717752_s_at | SEC14L1 | 6397   | chr17:75136990-75213183 (+) //  | down |
|               |         |        | 84.8 // q25.2                   |      |
| 11722354_at   | SEC23A  | 10484  | chr14:39501122-39572732 (-) //  | down |
|               |         |        | 98.24 // q21.1                  |      |
| 11731451_at   | SEC62   | 7095   | chr3:169684584-169716161 (+)    | down |
|               |         |        | // 72.06 // q26.2               |      |

|               |          |        |                                                                                                        |      |
|---------------|----------|--------|--------------------------------------------------------------------------------------------------------|------|
| 11718862_at   | SEC63    | 11231  | chr6:108188961-108279504 (-) //<br>87.17 // q21                                                        | down |
| 11734049_a_at | SEH1L    | 81929  | chr18:12947982-12987533 (+) //<br>91.31 // p11.21                                                      | down |
| 11717204_at   | SEL1L    | 6400   | chr14:81937890-82000205 (-) //<br>97.34 // q31.1                                                       | down |
| 11723668_at   | SEMA3C   | 10512  | chr7:80371854-80548667 (-) //<br>96.6 // q21.11                                                        | down |
| 11719521_at   | SEMA5A   | 9037   | chr5:9035141-9546233 (-) //<br>95.93 // p15.31                                                         | down |
| 11741434_s_at | SEPT10   | 151011 | chr2:110300377-110371783 (-) //<br>89.56 // q13 ///<br>chr8:57387901-57390834 (-) //<br>73.13 // q12.1 | down |
| 11754612_a_at | SEPT11   | 55752  | chr4:77870918-77959764 (+) //<br>94.61 // q21.1                                                        | down |
| 11736061_a_at | SERPINB5 | 5268   | chr18:61143993-61172317 (+) //<br>86.19 // q21.33                                                      | down |
| 11728413_at   | SERPINB8 | 5271   | chr18:61637260-61656600 (+) //<br>68.88 // q22.1                                                       | down |
| 11757442_a_at | SERPINE2 | 5270   | chr2:224839844-224840623 (-) //<br>90.28 // q36.1                                                      | down |
| 11733919_s_at | SERTAD2  | 9792   | chr2:64858754-64881046 (-) //<br>97.65 // p14                                                          | down |
| 11731246_s_at | SERTAD4  | 56256  | chr1:210406143-210416454 (+)<br>// 94.71 // q32.2                                                      | down |
| 11756494_a_at | SETD6    | 79918  | chr16:58549433-58553407 (+) //<br>98.1 // q21                                                          | down |
| 11717555_at   | SETD7    | 80854  | chr4:140427191-140477577 (-) //<br>97.2 // q31.1                                                       | down |
| 11764283_s_at | SFRS18   | 25957  | chr6:99846538-99847045 (-) //<br>96.2 // q16.2                                                         | down |
| 11756286_a_at | SFXN2    | 118980 | chr10:104474274-104498951 (+)<br>// 81.66 // q24.32                                                    | down |
| 11724104_s_at | SGK3     | 23678  | chr8:67624652-67774257 (+) //<br>83.03 // q13.1                                                        | down |
| 11726963_s_at | SGTB     | 54557  | chr5:64961756-65017940 (-) //<br>70.79 // q12.3                                                        | down |
| 11717409_at   | SH2B3    | 10019  | chr12:111843751-111889427 (+)<br>// 92.01 // q24.12                                                    | down |
| 11718847_at   | SH3GLB1  | 51100  | chr1:87170252-87213867 (+) //<br>75.54 // p22.3                                                        | down |
| 11754273_a_at | SH3RF1   | 57630  | chr4:170015362-170192087 (-) //<br>90.3 // q32.3                                                       | down |
| 11747888_a_at | SH3YL1   | 26751  | chr2:218665-264859 (-) // 88.25<br>// p25.3                                                            | down |
| 11728404_at   | SHCBP1   | 79801  | chr16:46614466-46655538 (-) //<br>89.68 // q11.2                                                       | down |
| 11763274_a_at | SIPA1L1  | 26037  | chr14:72052997-72207926 (+) //<br>98.81 // q24.2                                                       | down |
| 11722069_a_at | SKA1     | 220134 | chr18:47901391-47920471 (+) //<br>51.9 // q21.1                                                        | down |
| 11722823_a_at | SKP1     | 6500   | chr5:133492081-133512724 (-) //                                                                        | down |



|               |          |        |                                                        |      |
|---------------|----------|--------|--------------------------------------------------------|------|
| 11744052_a_at | SLC11A2  | 4891   | 98.94 // q31.1<br>chr12:51379491-51420199 (-) //       | down |
| 11718656_at   | SLC16A1  | 6566   | 97.96 // q13.12<br>chr1:113454468-113498975 (-) //     | down |
| 11725662_a_at | SLC16A14 | 151473 | 99.06 // p13.2<br>chr2:230899695-230933715 (-) //      | down |
| 11723149_a_at | SLC19A2  | 10560  | 96.71 // q36.3<br>chr1:169432464-169455241 (-) //      | down |
| 11757680_a_at | SLC1A4   | 6509   | 96.39 // q24.2<br>chr2:65249626-65250262 (+) //        | down |
| 11758222_s_at | SLC20A1  | 6574   | 96.56 // p14<br>chr2:113420931-113421402 (+) //        | down |
| 11733119_a_at | SLC35B4  | 84912  | 93.24 // q13<br>chr7:133973961-134001861 (-) //        | down |
| 11739254_at   | SLC35E1  | 79939  | 91.28 // q33<br>chr19:16660649-16683193 (-) //         | down |
| 11720075_s_at | SLC35F5  | 80255  | 81.5 // p13.11<br>chr2:114471358-114514400 (-) //      | down |
| 11717102_a_at | SLC38A1  | 81539  | 96.78 // q14.1<br>chr12:46576837-46663220 (-) //       | down |
| 11739000_a_at | SLC38A2  | 54407  | 93.32 // q13.11<br>chr12:46751970-46766650 (-) //      | down |
| 11718461_at   | SLC39A11 | 201266 | 95.78 // q13.11<br>chr17:70642087-71088853 (-) //      | down |
| 11724252_s_at | SLC39A8  | 64116  | 96.13 // q24.3<br>chr4:103182822-103266641 (-) //      | down |
| 11733492_s_at | SLC44A5  | 204962 | 95.06 // q24<br>chr1:75667816-76076799 (-) //          | down |
| 11727279_s_at | SLC4A7   | 9497   | 97.96 // p31.1<br>chr3:27414213-27498245 (-) //        | down |
| 11722413_a_at | SLC7A1   | 6541   | 97.0 // p24.1<br>chr13:30083550-30169847 (-) //        | down |
| 11720989_a_at | SLC7A7   | 9056   | 97.86 // q12.3<br>chr14:23242430-23292653 (-) //       | down |
| 11723044_at   | SMAD1    | 4086   | 97.55 // q11.2<br>chr4:146402910-146480328 (+) //      | down |
| 11720018_a_at | SMAP1    | 60682  | // 97.48 // q31.21<br>chr6:71377478-71571718 (+) //    | down |
| 11743341_a_at | SMARCA2  | 6595   | 96.37 // q13<br>chr9:2021944-2193624 (+) //            | down |
| 11742782_at   | SMARCC1  | 6599   | 92.43 // p24.3<br>chr3:47626926-47823407 (-) //        | down |
| 11758700_s_at | SMC3     | 9126   | 95.75 // p21.31<br>chr10:112362954-112364390 (+) //    | down |
| 11754320_a_at | SMC4     | 10051  | // 96.69 // q25.2 ///<br>chr2:99719049-99719544 (+) // | down |
| 11724351_a_at | SMC6     | 79677  | 94.35 // q11.2<br>chr3:160131589-160152743 (+) //      | down |
| 11717598_s_at | SMPD1    | 6609   | // 95.15 // q25.33<br>chr2:17845079-17935097 (-) //    | down |
|               |          |        | 97.63 // p24.2<br>chr11:6411556-6416228 (+) //         | down |
|               |          |        | 95.47 // p15.4                                         |      |

|               |        |        |                                                                                  |      |
|---------------|--------|--------|----------------------------------------------------------------------------------|------|
| 11748382_a_at | SMURF2 | 64750  | chr17:62541906-62658079 (-) // 98.4 // q23.3                                     | down |
| 11727830_at   | SNAP29 | 9342   | chr22:21213291-21245499 (+) // 84.28 // q11.21                                   | down |
| 11734792_at   | SNAPC1 | 6617   | chr14:62229074-62263145 (+) // 81.83 // q23.2                                    | down |
| 11723769_at   | SNX24  | 28966  | chr5:122181143-122344902 (+) // 77.77 // q23.2                                   | down |
| 11721960_a_at | SNX30  | 401548 | chr9:115513117-115637267 (+) // 98.25 // q32                                     | down |
| 11761125_at   | SNX5   | 27131  | chr20:17927597-17949437 (-) // 68.09 // p11.23                                   | down |
| 11759151_at   | SPC24  | 147841 | chr19:11256483-11266484 (-) // 39.8 // p13.2                                     | down |
| 11726158_at   | SPIN4  | 139886 | chrX:62567106-62571365 (-) // 62.38 // q11.1                                     | down |
| 11720132_a_at | SPIRE1 | 56907  | chr18:12443294-12658133 (-) // 69.78 // p11.21                                   | down |
| 11734827_at   | SPRED1 | 161742 | chr15:38544235-38649449 (+) // 95.01 // q14                                      | down |
| 11743562_a_at | SR140  | 23350  | chr3:142720371-142779567 (+) // 96.27 // q23                                     | down |
| 11747210_a_at | SRI    | 6717   | chr7:87834972-87849351 (-) // 91.28 // q21.12                                    | down |
| 11734789_at   | SRR    | 63826  | chr17:2206959-2228553 (+) // 89.66 // p13.3                                      | down |
| 11718777_at   | SRRM1  | 10250  | chr1:24969502-24999974 (+) // 92.52 // p36.11                                    | down |
| 11743269_a_at | SRSF1  | 6426   | chr17:56078235-56084707 (-) // 92.16 // q22                                      | down |
| 11759484_s_at | STAG1  | 10274  | chr3:136055077-136471258 (-) // 98.73 // q22.3                                   | down |
| 11720755_at   | STAT3  | 6774   | chr17:40465342-40540586 (-) // 91.72 // q21.2                                    | down |
| 11755400_s_at | STK39  | 27347  | chr2:168810530-168969616 (-) // 92.98 // q24.3                                   | down |
| 11719666_a_at | STMN1  | 3925   | chr1:26226530-26232644 (-) // 95.76 // p36.11                                    | down |
| 11724830_at   | STS    | 412    | chrX:7137366-7272851 (+) // 87.9 // p22.31                                       | down |
| 11719534_a_at | STX3   | 6809   | chr11:59522478-59570529 (+) // 97.54 // q12.1                                    | down |
| 11758922_at   | STXBP6 | 29091  | chr14:25278862-25519095 (-) // 95.83 // q12                                      | down |
| 11720599_s_at | SUB1   | 10923  | chr5:32586219-32604172 (+) // 87.52 // p13.3                                     | down |
| 11721516_at   | SUDS3  | 64426  | chr12:118814184-118855840 (+) // 99.96 // q24.23                                 | down |
| 11739486_at   | SUZ12  | 23512  | chr17:30264038-30328059 (+) // 96.46 // q11.2                                    | down |
| 11744067_s_at | SYNGR2 | 9144   | chr15:30336642-30338297 (+) // 79.58 // q13.2 /// chr17:76164610-76169013 (+) // | down |

|               |          |        |                                                                 |      |
|---------------|----------|--------|-----------------------------------------------------------------|------|
| 11748818_x_at | TADA3    | 10474  | 95.72 // q25.3<br>chr3:9821939-9834695 (-) //<br>100.0 // p25.3 | down |
| 11743098_a_at | TARSL2   | 123283 | chr15:102193800-102264807 (-)<br>// 98.98 // q26.3              | down |
| 11720224_a_at | TBC1D1   | 23216  | chr4:37892704-38140793 (+) //<br>98.17 // p14                   | down |
| 11716928_a_at | TBC1D5   | 9779   | chr3:17198659-17782535 (-) //<br>89.3 // p24.3                  | down |
| 11731819_a_at | TBC1D8B  | 54885  | chrX:106045918-106119375 (+)<br>// 97.63 // q22.3               | down |
| 11720266_a_at | TBCK     | 93627  | chr4:106967233-107237392 (-) //<br>99.22 // q24                 | down |
| 11740213_a_at | TBL1X    | 6907   | chrX:9431105-9687780 (+) //<br>97.47 // p22.31                  | down |
| 11742714_a_at | TBRG1    | 84897  | chr11:124492740-124505825 (+)<br>// 77.56 // q24.2              | down |
| 11723527_a_at | TCTEX1D2 | 255758 | chr3:196018099-196045159 (-) //<br>90.57 // q29                 | down |
| 11718066_a_at | TCTN1    | 79600  | chr12:111051896-111086935 (+)<br>// 95.16 // q24.11             | down |
| 11755878_a_at | TESK1    | 7016   | chr9:35605487-35610037 (+) //<br>94.45 // p13.3                 | down |
| 11722041_s_at | TEX2     | 55852  | chr17:62224794-62340660 (-) //<br>97.94 // q23.3                | down |
| 11743642_s_at | TFAP2A   | 7020   | chr6:10396915-10412622 (-) //<br>89.63 // p24.3                 | down |
| 11716903_a_at | TGOLN2   | 10618  | chr2:85545145-85555407 (-) //<br>91.76 // p11.2                 | down |
| 11739446_a_at | TH1L     | 51497  | chr20:57556308-57570168 (+) //<br>96.86 // q13.32               | down |
| 11758842_at   | THBS1    | 7057   | chr15:39873133-39891116 (+) //<br>96.06 // q14                  | down |
| 11759126_a_at | THRA     | 7067   | chr17:38219062-38249110 (+) //<br>97.76 // q21.1                | down |
| 11725969_a_at | THUMPD1  | 55623  | chr16:20744990-20753199 (-) //<br>51.05 // p12.3                | down |
| 11722786_s_at | TIMP2    | 7077   | chr17:76849058-76921472 (-) //<br>90.02 // q25.3                | down |
| 11726766_x_at | TIPRL    | 261726 | chr1:168148082-168171349 (+)<br>// 96.75 // q24.2               | down |
| 11715545_at   | TMED10   | 10972  | chr14:75598171-75643349 (-) //<br>65.49 // q24.3                | down |
| 11757430_s_at | TMED5    | 50999  | chr1:93617410-93618009 (-) //<br>99.17 // p22.1                 | down |
| 11719539_a_at | TMEM194A | 23306  | chr12:57449425-57472553 (-) //<br>98.64 // q13.3                | down |
| 11744735_a_at | TMEM200A | 114801 | chr6:130686518-130764569 (+)<br>// 98.56 // q23.1               | down |
| 11716578_at   | TMEM43   | 79188  | chr3:14166439-14185179 (+) //<br>98.67 // p25.1                 | down |
| 11723540_a_at | TMEM80   | 283232 | chr11:695514-704123 (+) // 96.7<br>// p15.5                     | down |

|               |           |        |                                                                                                 |      |
|---------------|-----------|--------|-------------------------------------------------------------------------------------------------|------|
| 11721632_a_at | TMEM97    | 27346  | chr17:26646120-26656088 (+) // 87.71 // q11.2                                                   | down |
| 11737296_s_at | TMTC4     | 84899  | chr13:101256090-101327103 (-) // 98.89 // q32.3                                                 | down |
| 11721097_at   | TMX1      | 81542  | chr14:51706885-51724370 (+) // 91.1 // q22.1                                                    | down |
| 11759288_at   | TMX4      | 56255  | chr20:7957999-8000521 (-) // 86.09 // p12.3                                                     | down |
| 11716063_at   | TNC       | 3371   | chr9:117782507-117880818 (-) // 97.71 // q33.1                                                  | down |
| 11745020_a_at | TNFRSF12A | 51330  | chr16:3070359-3072381 (+) // 96.01 // p13.3                                                     | down |
| 11736495_a_at | TNRC6B    | 23112  | chr22:40573928-40731809 (+) // 95.57 // q13.1                                                   | down |
| 11727782_a_at | TPM4      | 7171   | chr19:16187115-16213813 (+) // 85.24 // p13.12 /// chr3:27674211-27676918 (+) // 79.74 // p24.1 | down |
| 11759962_at   | TPRKB     | 51002  | chr2:73957387-73964467 (-) // 99.75 // p13.1                                                    | down |
| 11720257_a_at | TRAPPC6B  | 122553 | chr14:39617014-39640038 (-) // 67.79 // q21.1                                                   | down |
| 11719811_a_at | TRIB3     | 57761  | chr20:361260-378203 (+) // 85.76 // p13                                                         | down |
| 11751166_a_at | TRIM5     | 85363  | chr11:5686479-5701462 (-) // 80.7 // p15.4                                                      | down |
| 11728915_at   | TRIOBP    | 11078  | chr22:38142240-38156253 (+) // 63.08 // q13.1                                                   | down |
| 11723437_at   | TSGA14    | 95681  | chr7:130034500-130081078 (-) // 96.33 // q32.2                                                  | down |
| 11744743_a_at | TSHZ1     | 10194  | chr18:72994818-73001898 (+) // 88.31 // q22.3                                                   | down |
| 11722242_at   | TSPAN12   | 23554  | chr7:120427373-120498411 (-) // 98.9 // q31.31                                                  | down |
| 11735944_x_at | TTC21B    | 79809  | chr2:166730453-166810348 (-) // 92.64 // q24.3                                                  | down |
| 11743792_a_at | TTC39C    | 125488 | chr18:21594195-21715932 (+) // 82.15 // q11.2                                                   | down |
| 11754362_a_at | TTC7A     | 57217  | chr2:47177559-47303263 (+) // 94.84 // p21                                                      | down |
| 11727514_at   | TTC9      | 23508  | chr14:71108296-71141812 (+) // 75.88 // q24.2                                                   | down |
| 11739206_a_at | TTL       | 150465 | chr2:113239730-113290300 (+) // 84.02 // q13                                                    | down |
| 11732219_a_at | TUBE1     | 51175  | chr6:112391860-112408751 (-) // 97.75 // q21                                                    | down |
| 11719690_at   | TWSG1     | 57045  | chr18:9334764-9402418 (+) // 98.4 // p11.22                                                     | down |
| 11723856_at   | TXNDC16   | 57544  | chr14:52897307-53019301 (-) // 88.0 // q22.1                                                    | down |
| 11752765_s_at | TXNIP     | 10628  | chr1:145438489-145442130 (+) // 99.81 // q21.1                                                  | down |
| 11751805_a_at | TYMS      | 7298   | chr18:657742-672997 (+) //                                                                      | down |

|               |         |        |                                                                                                       |      |
|---------------|---------|--------|-------------------------------------------------------------------------------------------------------|------|
| 11722102_a_at | TYRO3   | 7301   | 100.0 // p11.32<br>chr15:41851190-41871536 (+) //<br>92.99 // q15.1                                   | down |
| 11727817_at   | UBASH3B | 84959  | chr11:122525899-122685185 (+)<br>// 97.6 // q24.1                                                     | down |
| 11722028_at   | UBE2G1  | 7326   | chr17:4172511-4269973 (-) //<br>94.74 // p13.2                                                        | down |
| 11719284_a_at | UBR7    | 55148  | chr14:93673400-93695560 (+) //<br>99.27 // q32.12                                                     | down |
| 11755633_a_at | UBXN8   | 7993   | chr8:30601705-30624421 (+) //<br>99.5 // p12                                                          | down |
| 11759304_at   | UGT8    | 7368   | chr4:115519557-115599744 (+) //<br>95.72 // q26                                                       | down |
| 11735032_a_at | UPRT    | 139596 | chrX:74493895-74524434 (+) //<br>97.83 // q13.3                                                       | down |
| 11745425_a_at | USP25   | 29761  | chr21:17102343-17252377 (+) //<br>98.02 // q21.1                                                      | down |
| 11725800_a_at | USP46   | 64854  | chr4:53456530-53522759 (-) //<br>84.42 // q12                                                         | down |
| 11758383_s_at | USP6NL  | 9712   | chr10:11502510-11503163 (-) //<br>91.93 // p14                                                        | down |
| 11724333_a_at | USP8    | 9101   | chr15:50716578-50793499 (+) //<br>91.4 // q21.2                                                       | down |
| 11724649_at   | VANGL1  | 81839  | chr1:116184554-116240842 (+) //<br>97.62 // p13.1                                                     | down |
| 11718191_at   | VEZF1   | 7716   | chr17:56048912-56065615 (-) //<br>96.28 // q22 ///<br>chr3:192871332-192875088 (-) //<br>71.62 // q29 | down |
| 11757631_s_at | VGLL3   | 389136 | chr3:86989786-86990331 (-) //<br>89.01 // p12.1                                                       | down |
| 11715976_a_at | VGLL4   | 9686   | chr3:11597542-11685566 (-) //<br>97.7 // p25.3                                                        | down |
| 11717608_at   | VMA21   | 203547 | chrX:150565675-150577836 (+)<br>// 74.51 // q28                                                       | down |
| 11747422_a_at | WBSCR22 | 114049 | chr7:73097897-73112323 (+) //<br>93.18 // q11.23                                                      | down |
| 11759217_at   | WNT3    | 7473   | chr17:44839871-44896126 (-) //<br>96.57 // q21.31                                                     | down |
| 11732393_a_at | WWC2    | 80014  | chr4:184020445-184241927 (+)<br>// 98.19 // q35.1                                                     | down |
| 11728136_at   | XK      | 7504   | chrX:37544932-37590348 (+) //<br>79.34 // p21.1                                                       | down |
| 11717920_a_at | YAP1    | 10413  | chr11:101981209-102104149 (+)<br>// 91.79 // q22.1                                                    | down |
| 11731397_a_at | YWHAB   | 7529   | chr20:43514185-43537354 (+) //<br>86.93 // q13.12                                                     | down |
| 11726808_at   | ZAK     | 51776  | chr2:173940564-174132737 (+)<br>// 91.18 // q31.1                                                     | down |
| 11727339_a_at | ZBTB2   | 57621  | chr6:151685172-151712835 (-) //<br>98.52 // q25.1                                                     | down |
| 11725870_at   | ZBTB41  | 360023 | chr1:197122742-197169721 (-) //<br>92.14 // q31.3                                                     | down |

|               |          |        |                                                    |      |
|---------------|----------|--------|----------------------------------------------------|------|
| 11730939_at   | ZBTB8A   | 653121 | chr1:33004743-33071551 (+) //<br>73.39 // p35.1    | down |
| 11729839_at   | ZCCHC2   | 54877  | chr18:60190657-60245812 (+) //<br>95.24 // q21.33  | down |
| 11721528_at   | ZDHHC2   | 51201  | chr8:17013408-17080793 (+) //<br>96.01 // p22      | down |
| 11725596_a_at | ZDHHC23  | 254887 | chr3:113666747-113681829 (+) //<br>95.26 // q13.31 | down |
| 11726524_s_at | ZFHX3    | 463    | chr16:72816787-73082274 (-) //<br>95.7 // q22.2    | down |
| 11733145_at   | ZFP161   | 7541   | chr18:5289018-5296194 (-) //<br>98.3 // p11.31     | down |
| 11726600_s_at | ZMPSTE24 | 10269  | chr1:40723721-40759856 (+) //<br>98.16 // p34.2    | down |
| 11739975_at   | ZNF117   | 51351  | chr7:64432793-64442497 (-) //<br>67.72 // q11.21   | down |
| 11721601_s_at | ZNF238   | 10472  | chr1:244216506-244220778 (+)<br>// 92.03 // q44    | down |
| 11739896_at   | ZNF280C  | 55609  | chrX:129336672-129402922 (-)<br>// 89.69 // q26.1  | down |
| 11762388_at   | ZNF280D  | 54816  | chr15:56944687-56999506 (-) //<br>95.47 // q21.3   | down |
| 11755232_s_at | ZNF468   | 90333  | chr6:163881899-163883249 (+)<br>// 62.04 // q26    | down |
| 11733207_a_at | ZNF480   | 147657 | chr19:52800420-52826572 (+) //<br>39.83 // q13.41  | down |
| 11758902_at   | ZNF641   | 121274 | chr12:48730959-48744554 (-) //<br>85.12 // q13.11  | down |
| 11721524_s_at | ZNF706   | 51123  | chr8:102209271-102217960 (-) //<br>97.31 // q22.3  | down |

**Supplementary Table 5: the results of the Go analysis between the differently expressed genes**

| GO analysis (molecular function)   |             |                         |                        |
|------------------------------------|-------------|-------------------------|------------------------|
| Gene Set Name                      | Gene number | Significant probability | Gene name              |
| CHEMOKINE_ACTIVITY                 | 3           | 9.30E-02                | CCL20,CXCL3,IL8        |
| CHEMOKINE_RECEPTOR_BINDING         | 3           | 9.82E-02                | CCL20,CXCL3,IL8        |
| PROTEIN_KINASE_INHIBITOR_ACTIVITY  | 2           | 1.26E-01                | CDKN2B,PKIG            |
| KINASE_INHIBITOR_ACTIVITY          | 2           | 1.35E-01                | CDKN2B,PKIG            |
| G_PROTEIN_COUPLED_RECEPTOR_BINDING | 3           | 1.62E-01                | CCL20,CXCL3,IL8        |
| PROTEIN_KINASE_REGULATOR_ACTIVITY  | 2           | 2.66E-01                | CDKN2B,PKIG            |
| UDP_GLYCOSYLTRANSFERASE_ACTIVITY   | 2           | 2.95E-01                | MGAT2,GALNT7           |
| CYTOKINE_ACTIVITY                  | 4           | 3.33E-01                | CCL20,CXCL3,IL8,SPRED1 |

|                                                                          |   |          |                       |
|--------------------------------------------------------------------------|---|----------|-----------------------|
| KINASE_REGULATOR_ACTIVITY                                                | 2 | 3.33E-01 | CDKN2B,PKIG           |
| PHOSPHOLIPID_BINDING                                                     | 2 | 3.43E-01 | PIGK,PLEKHA3          |
| GO analysis (biological process)                                         |   |          |                       |
| REGULATION_OF_TRANSFORMING_GROWTH_FACTOR_BETA_RECEPTOR                   | 2 | 3.73E-02 | CDKN2B,HIPK2          |
| TRANSMEMBRANE_RECEPTOR_PROTEIN_SERINE_THREONINE_KINASE_SIGNALING_PATHWAY | 3 | 8.54E-02 | CDKN2B,HIPK2,BMP2     |
| REGULATION_OF_SMALL_GTPASE_MEDIATED_SIGNAL_TRANSDUCTION                  | 2 | 9.13E-02 | MFN2,CDC42BPA         |
| ORGANELLE_LOCALIZATION                                                   | 2 | 1.05E-01 | MFN2,SNAP29           |
| CELL_CYCLE_ARREST_GO_0007050                                             | 3 | 1.32E-01 | CDKN2B,MFN2,IL8       |
| NEGATIVE_REGULATION_OF_TRANSFERASE_ACTIVITY                              | 2 | 1.81E-01 | SPRED1,TRIB3          |
| TRANSFORMING_GROWTH_FACTOR_BETA_RECEPTOR_SIGNALING_PATHWAY               | 2 | 1.90E-01 | CDKN2B,HIPK2          |
| REGULATION_OF_CELL_ADHESION                                              | 2 | 1.98E-01 | IL8,ARHGDI1           |
| NEGATIVE_REGULATION_OF_CELL_CYCLE                                        | 3 | 2.55E-01 | CDKN2B,MFN2,IL8       |
| SMALL_GTPASE_MEDIATED_SIGNAL_TRANSDUCTION                                | 3 | 3.16E-01 | MFN2,CDC42BPA,ARHGDI1 |
| GO analysis (cellular component)                                         |   |          |                       |
| VOLTAGE_GATED_POTASSIUM_CHANNEL_COMPLEX                                  | 2 | 2.79E-01 | KCNI1,KCNO1           |
| INTRINSIC_TO_ORGANELLE_MEMBRANE                                          | 2 | 3.94E-01 | PIGK,MFN2             |

**Supplementary Table 6: the results of the pathway analysis of the differently expressed genes**

| pathway analysis result |             |             |               |
|-------------------------|-------------|-------------|---------------|
| Gene Set Name           | Gene number | Significant | Gene name     |
| BIOCARTA_AGPCR_PATHWAY  | 2           | 3.94E-02    | PRKCA,PRKAR2A |
| BIOCARTA_CBL_PATHWAY    | 2           | 3.94E-02    | PRKCA,SH3GLB1 |
| BIOCARTA_CDMAC_PATHWAY  | 2           | 5.78E-02    | PRKCA,PLCB1   |
| BIOCARTA_CK1_PATHWAY    | 2           | 6.45E-02    | PRKAR2A,PLCB1 |
| BIOCARTA_SPPA_PATHWAY   | 2           | 1.01E-01    | PRKCA,PLCB1   |
| BIOCARTA_CCR3_PATHWAY   | 2           | 1.09E-01    | PRKCA,PLCB1   |
| BIOCARTA_NOS1_PATHWAY   | 2           | 1.17E-01    | PRKCA,PRKAR2A |
| BIOCARTA_TPO_PATHWAY    | 2           | 1.17E-01    | PRKCA,STAT3   |
| BIOCARTA_CREB_PATHWAY   | 2           | 1.42E-01    | PRKCA,PRKAR2A |
| BIOCARTA_EDG1_PATHWAY   | 2           | 1.42E-01    | PRKCA,PLCB1   |



**Supplemental Table 7: the Primer sequences used in the study**

| <b>Gene</b> | <b>Forward Sequence</b> | <b>Reverse Sequence</b> | <b>Size (bp)</b> |
|-------------|-------------------------|-------------------------|------------------|
| GAPDH       | TGACTTCAACAGCGACACCCA   | CACCCTGTTGCTGTAGCCAAA   | 121              |
| SCIN        | TCTGCGTTCCTGACTGTTC     | GACCTCCTTTCTTTGATGTTCC  | 154              |
| CDKN2C      | AGACTGCTACTTAGAGGTGCTA  | CAGGTTCCCTTCATTATCC     | 153              |
| CDKN2B      | CTGGACCTGGTGGCTACG      | ACATTGGAGTGAACGCATCG    | 114              |
| DIAPH1      | CAGTTGGGTGCAAACATTTGG   | TCCGGCTATCGTAACTCCCAG   | 107              |
| MCM4        | TATCTAAGGGCAAAACAC      | CAGTCACTGTCAGGAAAT      | 141              |
| STAT3       | GACATGGAGTTGACCTCGGAGTG | GGTGGCAGAATGCAGGTAGGC   | 103              |
| EGFR        | ATGAGATGGAGGAAGACGG     | CGGCAGGATGTGGAGAT       | 173              |
| RAC1        | ATGTCCGTGCAAAGTGGTATC   | CTCGGATCGCTTCGTCAAACA   | 249              |
| DHFR        | CTGTCTTAGATTGGGGAACCC   | ATGAGAACCTGCTCGCTGA     | 158              |
| CDK2        | CTGGACACTGAGACTGAGG     | GAGGACCCGATGAGAATGG     | 264              |
| COL4A1      | GGACTACCTGGAACAAAAGGG   | GCCAAGTATCTCACCTGGATCA  | 240              |
| PRKCA       | TGGACTTATCCATCAAGGGATGA | AGTGTGATCCATTCCGCAGAG   | 100              |
| CDK4        | AGTGGTGGAACAGTCAAG      | AGCCAATCAGGTCAAAG       | 248              |
| CCNB1       | CTAAGATTGGAGAGGTTGATGC  | GGTAATGTTGTAGAGTTGGTGTC | 177              |
| ARHGAP5     | ACTGCACTGGTACAAATGTTGG  | TCACAGTCTGCACAAGTTTTCA  | 133              |
| ITGB1       | CCTACTTCTGCACGATGTGATG  | CCTTTGCTACGGTTGGTTACATT | 128              |
| PLCB1       | GCCTCGCCAGAAAAGGACAA    | CATCTCAACAGAGGAGTTTCCAG | 197              |
